1 Post-mitotic centriole disengagement and maturation  
2 leads to centrosome amplification in polyploid  
3 trophoblast giant cells  
4

5 Garrison Buss<sup>1,\*</sup>, Miranda B. Stratton<sup>2,\*</sup>, Ljiljana Milenkovic<sup>2</sup> and Tim Stearns<sup>2,3,+</sup>  
6

7 <sup>1</sup>Department of Molecular and Cellular Physiology, Stanford University School of Medicine,  
8 Stanford, CA 94305, USA

9 <sup>2</sup>Department of Biology, Stanford University, Stanford, CA 94305, USA

10 <sup>3</sup>Department of Genetics, Stanford University School of Medicine, Stanford, CA 94305, USA

11 <sup>+</sup>Correspondence: [stearns@stanford.edu](mailto:stearns@stanford.edu)

12 <sup>\*</sup>Authors contributed equally to this work  
13

14 Running title: Centrosome amplification in endocycling cells  
15

## 16 **Abstract**

17  
18 DNA replication is normally coupled with centriole duplication in the cell cycle. Trophoblast giant  
19 cells (TGCs) of the placenta undergo endocycles resulting in polyploidy but their centriole state  
20 is not known. We used a cell culture model for TGC differentiation to examine centriole and  
21 centrosome number and properties. Prior to differentiation, trophoblast stem cells (TSCs) have  
22 either two centrioles before duplication, or four centrioles after. We find that average nuclear  
23 area increases approximately 8-fold over differentiation, but most TGCs do not have more than  
24 four centrioles. However, these centrioles become disengaged, acquire centrosome proteins,  
25 and can nucleate microtubules. In addition, some TGCs undergo further duplication and  
26 disengagement of centrioles, resulting in substantially higher numbers. Live imaging revealed  
27 that disengagement and separation are centriole autonomous and can occur asynchronously.  
28 Centriole amplification, when present, occurs by the standard mechanism of one centriole  
29 generating one procentriole. PLK4 inhibition blocks centriole formation in differentiating TGCs  
30 but does not affect endocycle progression. In summary, centrioles in TGC endocycles undergo  
31 disengagement and conversion to centrosomes. This increases centrosome number, but to a  
32 limited extent compared with DNA reduplication.

## 33 34 **Introduction**

35  
36 Centrosomes are the major microtubule organizing center (MTOC) in mammalian cells during  
37 interphase and assist in spindle formation during mitosis. They consist of two main elements: 1)  
38 a pair of centrioles, defined as microtubule-based cylindrical structures that are ~400 nm in  
39 length with nine-fold symmetry, and 2) associated pericentriolar material (PCM) that imparts the  
40 centrioles with MTOC activity (Nigg & Holland, 2018; Nigg & Stearns, 2011). Centrosomes are  
41 unique in that, along with chromosomal DNA, they are the only structures known to be  
42 duplicated exactly once per cell division cycle in animal cells. In mitotic cycles, newly-formed  
43 centrioles are engaged to their parental centriole and are embedded in the PCM of the parental  
44 centriole. Upon passage through mitosis, the engagement link is broken, and new centrioles  
45 undergo the centriole-to-centrosome conversion and acquire their own PCM (W. J. Wang et al.,  
46 2011). Disengaged centrioles usually remain close to each other by the action of cohesion  
47 fibers, until they separate at the initiation of mitosis (Nigg & Stearns, 2011; G. Wang et al.,  
48 2014). The duplication cycle of centrosomes ensures that there are two centrioles in a G1 cell,  
49 which duplicate in S-phase and are then segregated as pairs on the mitotic spindle (Tsou &  
50 Stearns, 2006; G. Wang et al., 2014). In the context of cells that adhere to this canonical form of  
51 centriole duplication and segregation, aberrant centriole number is detrimental (Godinho &  
52 Pellman, 2014).

53  
54 Centrioles are required to form a primary cilium for critical cell signaling pathways. One rationale  
55 for the tight control of centriole number is to ensure that only a single cilium can form in most  
56 cells (Nigg & Stearns, 2011). Centriole loss both prevents formation of the primary cilium and  
57 results in mitotic defects leading to p53-dependent cell cycle arrest (Lambrus et al., 2015).  
58 Conversely, having too many centrioles results in the formation of multiple cilia, compromising  
59 their function in signal transduction, as well as formation of multipolar spindles, interfering with

60 chromosome segregation (Godinho & Pellman, 2014; Mahjoub & Stearns, 2012). The presence  
61 of extra centrioles is a hallmark of many cancers, can itself promote tumorigenesis and invasion,  
62 and is strongly prognostic of poor patient outcomes (Basto et al., 2008; Denu et al., 2016).

63  
64 Although the centriole duplication and DNA replication cycles are coupled in most animal cells,  
65 there are examples of differentiated cells that alter their DNA replication, centriole duplication, or  
66 cell division cycles to specifically amplify DNA or centrioles. For example, multiciliated cells  
67 (MCCs) found in the airway epithelium, brain ependyma, and oviduct, have hundreds of  
68 centrioles and associated motile cilia that are used to generate directional fluid flow (Klos  
69 Dehring et al., 2013; Spassky & Meunier, 2017; Vladar & Stearns, 2007). MCCs engage a  
70 specific transcriptional program during differentiation that results in massive centriole  
71 amplification without concomitant DNA replication (Kyrousi et al., 2015; Vanderlaan et al., 1983;  
72 Vladar et al., 2018).

73  
74 There are also many examples in which amplification of DNA content has been observed,  
75 largely in the context of cells undergoing endocycles (Edgar et al., 2014; Macauley et al., 1998;  
76 Schoenfelder et al., 2014; Ullah et al., 2008). Endocycles encompass a range of cell cycle  
77 behaviors. Remarkably, little is known about the coordination of replication of centrioles and  
78 DNA in such endocycles. We seek here to determine whether endocycling cells specifically  
79 amplify DNA and not centrioles, separating the two cycles as in MCCs, or whether both are  
80 coordinately amplified during endocycles.

81  
82 Mammalian trophoblast giant cells (TGCs) are an important polyploid cell type that establishes  
83 the maternal-fetal interface for nutrient, oxygen, and waste exchange (Silva and Serakides,  
84 2016). Both the mother and fetus contribute to the formation, and in turn, the function of the  
85 developing placenta (Cross, 2005; Silva & Serakides, 2016; Simmons & Cross, 2005). TGCs  
86 invade and remodel the maternal decidua, which is critical for embryonic implantation and  
87 placentation (Maltepe & Fisher, 2015). Defects in trophoblast invasion can lead to pregnancy-  
88 related disease states; for example, preeclampsia is characterized by a loss or reduction of  
89 trophoblastic invasiveness, while gestational trophoblastic disease is characterized by increased  
90 invasiveness (Maltepe & Fisher, 2015; Silva & Serakides, 2016). TGCs have been studied as  
91 models of polyploidy with respect to genome amplification (Edgar et al., 2014; Ullah et al.,  
92 2008). There are several types of TGCs, based on their derivation and/or location in the  
93 placenta. These represent different paths towards polyploidy, including endocycling, cell fusion  
94 and cell division failure. (Klisch et al., 2017; Sakaue-Sawano et al., 2013; Simmons et al., 2007;  
95 Simmons & Cross, 2005; Zybina & Zybina, 2005; Zybina & Zybina, 1996).

96  
97 To address questions about the coordination of DNA and centriole duplication in endocycles, we  
98 focus here on murine mononuclear TGCs, which are derived by differentiation of murine  
99 trophoblast stem cells (TSCs). Mononuclear TSCs exit the canonical cell cycle and enter an  
100 endocycle in which DNA replication continues up to 64N without an intervening cell division  
101 (Ullah et al., 2008). We show that centrioles in endocycling TGCs undergo centriole  
102 disengagement and conversion to centrosomes without passage through mitosis. This leads to  
103 an increase in centrosome number but only to a limited extent compared with DNA

104 amplification. Thus, TGCs, like multiciliated epithelial cells, are able to uncouple the centriole  
105 and DNA cycles as part of a differentiation program.

106

## 107 **Results**

108

### 109 *Polyploidization of murine TGCs in the developing placenta and in vitro*

110

111 To investigate centriole and centrosome number in murine TGCs, we sought to establish  
112 conditions for *in vitro* differentiation that would represent those *in vivo*. Figure 1A shows a  
113 cartoon representation of the placenta, with the zone containing TGCs outlined in red. Figure 1B  
114 shows a section of the mouse conceptus at day 9.5 (e9.5), with the corresponding region  
115 containing TGCs, evident by their larger nuclear area. Cells in this zone were imaged in  
116 subsequent experiments as comparison to *in vitro*-produced TGCs (see below). We exploited  
117 an existing cell culture model to differentiate TGCs from derived trophoblast stem cells (TSCs)  
118 *in vitro* (Hannibal & Baker, 2016). Wild-type mouse TSCs isolated from blastocyst embryos were  
119 stimulated to differentiate into TGCs by shifting growth medium, as depicted in Figure 1C.  
120 Briefly, TSCs were grown in the presence of growth factors activin A, fibroblast growth factor-4  
121 (FGF-4), and heparin. At the beginning of differentiation (t=0d), the growth factors were  
122 removed and the culture medium was supplemented with retinoic acid for up to 10 days to  
123 encourage adoption of the TGC fate (Simmons et al., 2007). Differentiation was accompanied  
124 both by an increase in cell size (Figure 1C) and by induction of the canonical TGC marker  
125 placental lactogen-I alpha, *Pl3d1* (Hemberger et al., 2004; Rai & Cross, 2015; Simmons et al.,  
126 2007; Simmons & Cross, 2005) (Figure 1D).

127

128 To assess differentiation at the single-cell level, we chose to use nuclear size as a proxy for  
129 TGC differentiation as this correlates with increase in TGC ploidy and DNA content (Morimoto et  
130 al., 2021; Roukos et al., 2015; Supplementary Figure 1). Nuclear area enlargement has been  
131 previously shown to correlate with the increase in TGC marker gene expression, with most non-  
132 expressing cells falling in the range 118-249  $\mu\text{m}^2$ . (Carney, et al., 1993). Thus, we defined  
133 TGCs as mononuclear cells with a nuclear area of  $\geq 250 \mu\text{m}^2$  (Figure 1E). At t=0d, 90% of cells  
134 had nuclei smaller than this cutoff. At t=10d, 83% of cells had nuclei larger than this cutoff, with  
135 a mean of 960 +/- 72  $\mu\text{m}^2$ . In e9.5 placenta sections, 84% of cells in the TGC zone had nuclei  
136 larger than this cutoff, with a mean of 886 +/- 96  $\mu\text{m}^2$ , suggesting that the TGC *in vitro*  
137 differentiation conditions adequately allow for TGC polyploidization.

138

139 These results also show that some TSCs spontaneously differentiate into TGCs *in vitro*, and  
140 that not all cells become TGCs even when stimulated by the described treatments, consistent  
141 with previous findings (Yan et al., 2001). This results in a heterogeneous population of  
142 trophoblast cells at any given time point, with the fraction of cells adopting the TGC fate  
143 increasing over time (Figure 1D,E). We therefore consider a nuclear area of  $\geq 250 \mu\text{m}^2$  and  
144 differentiation time t=6d to be the onset of TGC fate for most of the population.

145

### 146 *Centriole and centrosome number increase during TGC endocycles*

147

148 Chromosomal DNA in mononuclear TGCs is amplified exponentially via serial S-phases without  
149 an intervening mitosis (Sakaue-Sawano et al., 2013; Zybina & Zybina, 1996). Thus, a simple  
150 hypothesis would be that centriole number would also increase exponentially, in coordination  
151 with DNA replication. We first investigated centriole number in TGCs in the natural context of  
152 the developing placenta of a mouse strain expressing eGFP-centrin2 to visualize centrioles and  
153 Arl13B-mCherry to mark primary cilia in embryonic cells (Bangs et al., 2015). Imaging sections  
154 of the TGC-containing zone of the e9.5 placenta showed both cells with normal-sized nuclei and  
155 cells with large nuclei and positive Cytokeratin 7 staining, indicative of being TGCs (Maldonado-  
156 Estrada et al., 2004). Examples of two fields of cells are shown in Figure 2A. The non-TGCs in  
157 these sections usually had two eGFP-centrin2 foci. This is as expected for canonical centriole  
158 duplication, where the centrin foci represent either two centrioles pre-duplication, or four  
159 centrioles in two engaged pairs post-duplication. TGCs usually had a higher number of eGFP-  
160 centrin2 foci, although the large cell size precluded a definitive determination of centriole  
161 number per cell (Figure 2A). In no case were primary cilia observed, consistent with previous  
162 work (Bangs et al., 2015).

163  
164 We next used the *in vitro* cell culture system to assess centriole and centrosome number during  
165 TGC differentiation (Figures 2B-E; Figures S2A-C). Cells were imaged by immunofluorescence  
166 staining for centrin and  $\gamma$ -tubulin, a component of the PCM. As expected, all  $\gamma$ -tubulin foci had  
167 at least one associated centrin focus. We counted any such  $\gamma$ -tubulin foci as a centrosome and  
168 all individually-resolvable centrin foci as centrioles (Figure 2B,C). At t=0d, the majority of TSCs  
169 in the population had two centrosomes, each with a single centriole (Figures 2B-D; Figure S2C),  
170 typical of diploid G1 cells.

171  
172 Over the course of 10 days of TGC differentiation, there was an increase in centriole and  
173 centrosome number (Figures 2B-D, Figures S2A,B). The fraction of cells with only 2 centrioles  
174 decreased, coincident with the increase in cells with 4 centrioles and 4+ centrioles (Figure 2B).  
175 Centrosome number increased in a similar manner over the time course, with the percentage of  
176 cells having two centrosomes decreasing to become a minority within the population (Figure  
177 2D). Interestingly, over this time course, many TGCs also increased their centriole and  
178 centrosome numbers beyond what would be expected for a cycling cell. At t=10d, 40% of TGCs  
179 had a higher-than-normal number of centrioles (>4 centrin foci per cell) and 65% had a higher-  
180 than-normal number of centrosomes (>2  $\gamma$ -tubulin foci per cell) (Figure 2B-D).

181  
182 Although the number of centrioles rose over time in differentiating TGCs, the increase was  
183 modest and not a function of  $2^n$  (1-2 extra centrioles per cell). Even if the analysis is restricted to  
184 cells with very large, single nuclei ( $\geq 1000 \mu\text{m}^2$ ), which presumably had undergone one or more  
185 endocycles (DNA  $\geq 8n$ ), the mean centriole number in these cells was 5.2, lower than the  
186 expected value of 8. Remarkably, the number of centrosomes, as determined by  $\gamma$ -tubulin foci,  
187 was the same in that population, with 5.2 centrosomes/cell.

188  
189 We observed that the number of centrioles was equal to the number of centrosomes in t=10d  
190 TGCs, suggesting that centrioles were not engaged and that they had acquired the PCM  
191 component  $\gamma$ -tubulin, despite not having passed through mitosis. This interpretation was

192 consistent with images of t=10d TGCs, showing that each focus of centrin was associated with  
193 a focus of  $\gamma$ -tubulin (Figure 2B). These single centrioles in t=10d TGCs were often dispersed,  
194 compared to centrioles in TSCs which were usually closely associated, as expected for  
195 centrioles linked by cohesion fibers.

196  
197 Given the marked similarities between the distributions of centrin and  $\gamma$ -tubulin during TGC  
198 differentiation, we quantified the centriole/centrosome ratio per cell over time. The number of  
199 cells with amplified centrosomes and exactly a 1:1 ratio of centrin to  $\gamma$ -tubulin increased over  
200 time to reach ~40% of all cells in the population by t=10d (Figure S2C). Even when the ratio of  
201 centriole to centrosome was not exactly 1:1, there was a clear trend for TGCs to approach that  
202 ratio throughout differentiation (Figure 2E). By t=10d, the relationship between centrin and  $\gamma$ -  
203 tubulin per cell increased to become strongly correlated, with  $R^2 = 0.8639$  (Figure 2E). These  
204 results show that centrioles in differentiating TGCs typically go through at least one duplication  
205 event before becoming disengaged in the absence of mitosis, that these centrioles undergo a  
206 conversion from centrioles to centrosomes during the endocycle, and that some TGCs gain  
207 supernumerary centrioles and centrosomes during differentiation.

#### 208 209 *Centrioles disengage in differentiating post-mitotic TGCs*

210  
211 To determine how new centrioles are formed in differentiating TGCs and how they might  
212 become single-centriole centrosomes, we observed centriole dynamics in living cells (Figure 3).  
213 For this purpose, we derived TSCs from blastocysts using the eGFP-centrin2; Arl13b-mCherry  
214 mouse strain, as previously described (Bangs et al., 2015; Kidder, 2014; Tanaka, 2006). These  
215 TSCs were plated on gridded 35 mm imaging dishes and were induced to differentiate as in  
216 Figure 1C. Beginning on day four of differentiation, centrioles were imaged by spinning-disk  
217 confocal microscopy for at least 48 h. Fields of mononucleate cells that were chosen were at the  
218 edge of colonies, such that cells had space to expand or divide over the course of imaging. As  
219 expected for the asynchronous differentiation process, these fields contained a mix of TSCs,  
220 early TGCs and late TGCs. With a few exceptions for cases of centriole amplification, we  
221 focused our analysis on mononuclear cells that had two centrin foci (i.e. either two centrioles or  
222 two pairs of centrioles) with the rationale that it would be easiest to observe changes to the  
223 normal pattern of duplication in such cells.

224  
225 In 95 time-lapse sequences, the centrioles in most cells behaved as expected for the canonical  
226 centriole duplication cycle in mitotically dividing cells. However, in a fraction of cells, which we  
227 assumed to be TGCs based on their position at the edge of a colony and increasingly large area  
228 and nuclei, we observed non-canonical centriole events relevant to the two major TGC  
229 centrosome phenotypes of centriole disengagement and amplification.

230  
231 We found that in some cells (n=7 examples) paired centrin foci separated (distance  $\geq 2 \mu\text{m}$ )  
232 without an intervening mitosis (Figure 3A, B and D), consistent with the enrichment for single-  
233 centriole centrosomes observed in fixed cells (Figure 2B-D). In some cases the separation of  
234 centrin foci occurred relatively close in time (~1 h) (Figure 3A), whereas in others, separation

235 occurred further apart in time (>20 h) (Figure 3B,D) despite the centriole pairs being in a  
236 common cytoplasm.

237  
238 Less frequently (n=3 examples), we found supernumerary centrin foci that appeared as pairs,  
239 consistent with the normal pattern of centriole duplication in which each parental centriole  
240 begets a single new centriole. In the example shown in Figure 3C, the cell begins with four pairs  
241 but rapidly separates a single pair (Figure 3C, numbers 5-6 and Video S3, 3:50) while the rest  
242 remain engaged. Approximately 20 h later, another pair separates (Video S3, 24:20). Thus, non-  
243 mitotic disengagement and separation can occur in differentiating TGCs with both normal and  
244 amplified centriole numbers.

245  
246 We note that in the example shown in Figure 3D (Supplementary Video 4), we were able to  
247 image the entire centriole cycle as a cell transitioned from mitotic cycling to the early stages of  
248 TGC differentiation, which culminated in the separation of two pairs of centrioles approximately  
249 40 h after the last mitosis. These results show that differentiating TGCs duplicate and disengage  
250 their centrioles without passing through mitosis, and that cells with amplified centrioles are able  
251 to disengage their centrioles in the absence of mitosis. Interestingly, separation events of  
252 engaged pairs can be tens of hours apart, indicating a single biochemical reaction does not  
253 determine separation of all engaged pairs in a shared cytoplasm.

#### 254 *Amplified centrioles in TGCs acquire microtubule nucleation competence*

255  
256 Given that about half of differentiating TGCs created new centrioles during the differentiation,  
257 and that newly formed centrioles typically mature in conjunction with the cell cycle, we sought to  
258 characterize the composition and function of centrioles formed within the context of the  
259 endocycle. We first used expansion microscopy to visualize centrioles at higher resolution. Cells  
260 were stained with antibodies against acetylated  $\alpha$ -tubulin, to mark centriolar microtubules, and  
261  $\gamma$ -tubulin, to mark pericentriolar material and centriole lumen. (Gambarotto et al., 2021; Wassie  
262 et al., 2019). We found that the centriolar structure in TGCs was similar to previous descriptions  
263 of centrioles in human cells imaged by expansion microscopy (Gambarotto et al., 2019).  
264 Acetylated tubulin labeling showed cylindrical structures with the dimensions of normal  
265 centrioles, some with orthogonally positioned procentrioles, identified from their shorter length  
266 (Figure 4A). All centrioles had associated  $\gamma$ -tubulin, both in pericentriolar distribution and in the  
267 lumen, as expected for centrioles that have matured to become centrosomes and functional  
268 MTOCs (Schweizer et al., 2021).

269  
270 The life cycle of centrioles in mitotically dividing cells is characterized by changes to centriole  
271 structure that occur over the course of more than one cell cycle and some of which require  
272 passage through mitosis (Izquierdo et al., 2014; Kong et al., 2014; Tsou & Stearns, 2006). We  
273 examined centrioles in TGCs for markers indicative of those changes to determine whether they  
274 also occur in the TGC endocycles. TGCs at t=8d were examined for tubulin modifications  
275 (Figure 4A, acetylated  $\alpha$ -tubulin) (polyglutamylated tubulin) proteins of the distal lumen (POC5,  
276 centrin), the proximal end (CNAP1) the centriole cap (CP110), pericentriolar material ( $\gamma$ -tubulin,  
277 Pericentrin, CDK5RAP2) and distal appendages (CEP164) (Figure 4B). For all proteins

278 examined, the centrioles in TGCs had the expected localization of the proteins considering the  
279 stage of duplication (i.e. single centrioles vs. centrioles with procentrioles). The one exception  
280 was CEP164, which was not present on every centriole but could be readily found on more than  
281 one centriole per cell.

282  
283 Next, we tested whether amplified centrioles were competent to serve as MTOCs, using  
284 nocodazole for microtubule depolymerization and washout to visualize newly-nucleated  
285 microtubules during regrowth. TSCs and t=6d TGCs were treated with 10  $\mu$ g/ml nocodazole for  
286 1h to depolymerize microtubules and assessed for regrowth at timepoints following washout ( $\alpha$ -  
287 tubulin) (Figure 4C), as well as the location of centrioles (centrin). Microtubule asters began to  
288 grow from centriole foci in TSCs within 5 minutes, with no more than two asters per cell. In  
289 TGCs, microtubule asters (Figure 4C) formed from each centriole focus, including in TGCs with  
290 amplified centrioles, suggesting that each centriole focus, even those consisting of single  
291 centrioles, is capable of serving as a functional MTOC. Thus, centrioles formed during the  
292 endocycle in TGCs undergo the centriole-to-centrosome conversion, assemble PCM, acquire  
293 maturity markers, and serve as functional MTOCs.

294  
295 *PLK4 activity is required for centriole amplification, but not for reduplication of DNA during the*  
296 *TGC endocycle*

297  
298 Since centriole and centrosome number increases with differentiation, we sought to determine if  
299 centriole formation was necessary for endocycles to proceed in differentiating TGCs. Although it  
300 is not currently possible to acutely prevent centriole separation and centrosome formation, we  
301 could prevent the formation of additional centrioles by treatment with Centrinone-B, an inhibitor  
302 of PLK4, the master regulator of centriole biogenesis (Holland et al., 2012; Sillibourne &  
303 Bornens, 2010; Wong et al., 2015). TSCs were treated with Centrinone-B at the beginning of  
304 differentiation and grown for 6 days (Figure 5A). Using centrin as a marker of centrioles, we  
305 determined the number of centrioles per cell relative to EdU status (Figure 5B-E). Centrinone-B  
306 treatment reduced the number of centrioles per cell, including greatly reducing instances of cells  
307 with four or more centrioles, suggesting that PLK4 inhibition was effective (Figure 5B,C). This  
308 suggests that centriole increase in TGCs is PLK4-dependent, just like in mitotic cells. To assess  
309 whether TGCs amplified their DNA despite the inhibition of centriole formation, newly  
310 synthesized DNA was labeled by incubation with the analog 5-ethynyl-2'-deoxyuridine (EdU) 24  
311 hours prior to the endpoint of the experiment (Figure 5A). Centrinone-B treatment did not  
312 significantly alter nuclear size or the fraction of EdU-positive cells (Figure 5D,E). We note that  
313 previous work suggested that PLK4 is required for TGC differentiation via phosphorylation of the  
314 transcriptional regulator HAND1 (Hemberger et al., 2004; Martindill et al., 2007). Given a more  
315 recent understanding of the essential role of PLK4 in centriole duplication and the  
316 consequences of centriole loss, we suggest that the earlier results might instead be due to  
317 centriole loss. These results suggest that PLK4 activity is necessary for increased centriole  
318 number but is dispensable for progression through the endocycle during TGC differentiation.



## 319 Discussion

320 Centriole formation usually occurs in the context of mitotically dividing cells, where it is coupled  
321 to DNA replication and cell cycle progression. It can be uncoupled from these events in  
322 specialized differentiated cells that make many centrioles under the control of a transcriptional  
323 program (Kyrousi et al., 2015; Spassky & Meunier, 2017; Vanderlaan et al., 1983) without  
324 replicating DNA. Here we have examined endocycling cells of the trophoblast lineage to  
325 determine whether centriole formation is coupled or uncoupled to the DNA endocycles. We find  
326 that TGCs *in situ* have amplified centrioles and that this can be recapitulated in an *in vitro*  
327 differentiation system. However, centriole number in these cells does not increase exponentially  
328 with DNA reduplication, as would be expected for tight coupling of these two processes. Rather,  
329 centrosome number increases to a greater extent than centriole number in TGCs because  
330 centrioles that are duplicated disengage, separate and become centrosomes, such that each  
331 centriole is an independent, functional microtubule organizing center. We consider the  
332 implications of these findings for understanding centriole and centrosome number control in  
333 division and differentiation.

334  
335 In Figure 6 we propose a model that integrates our findings. A TSC (shown on left) with two  
336 centrosomes (yellow dots) with either two or four centrioles (magenta barrels) either divides and  
337 cycles or undergoes differentiation into a TGC (shown on right). In their final state, TGCs have  
338 disengaged and separated centrioles that have acquired centrosome competence to reach a  
339 centriole to centrosome ratio of 1:1 (cell 2 and cell 4). In some cases, the total number of  
340 centrioles in a TGC is equal to that in the TSC from which it is derived, after one round of  
341 duplication (cell 2; four centrioles), whereas in others further rounds of centriole formation have  
342 occurred (cell 4; > four centrioles). Only disengaged centrioles are competent to duplicate, and  
343 we observe that disengagement and separation does not occur synchronously, resulting in  
344 centriole/centrosome numbers that are not a simple function of  $2^n$ . Additionally, our data cannot  
345 rule out the possibility that centrioles may also arise by some mechanism other than canonical  
346 duplication or that procentrioles formed by canonical duplication are not occasionally degraded.  
347 Many TGCs appeared to have odd numbers of centrioles and centrosomes rather than the even  
348 number expected from this model, and this may have resulted from such processes, but could  
349 also have been the result of inherent difficulties of imaging centrioles. In any case, TGCs  
350 bearing extra centrioles also ultimately resolve to a 1:1 ratio of centrioles to centrosomes.

351  
352 In cycling cells, disengagement of the procentriole from the mother centriole is a rate-limiting  
353 step for forming new centrioles. Indeed, laser ablation of a procentriole results in a new centriole  
354 forming from the same mother centriole (Lončarek et al., 2010). In contrast, we found that TGCs  
355 could exist for prolonged periods (days) with fully disengaged centrioles and no further centriole  
356 formation. One explanation would be that the transcriptional program of the TGC endocycle  
357 either does not express the genes for centriole duplication or expresses an inhibitor of the  
358 process. We note that the canonical centriole duplication proteins SASS6, PLK4 and STIL are  
359 all significantly downregulated in t=4d TGCs as determined by RNAseq (Ullah et al., 2020). How  
360 then would the relatively small fraction of TGCs with greater numbers of centrioles arise? It  
361 could be that these cases are due to the protein remaining after initiation of TGC differentiation  
362 or might be due to stochastic variation in establishment of the TGC transcriptional program or

363 incomplete repression of expression of centriole duplication genes could be sufficient to allow  
364 for duplication in some cells (Raj & Van Oudenaarden, 2008). This is consistent with the  
365 observation that most TGCs that have more than four centrioles have only five or six centrioles,  
366 rather than, for example, eight, as would be expected for another complete round of duplication.  
367

368 There are several differentiated cell types in mammals that break the “once and only once”  
369 pattern of centriole duplication observed for most cycling cells. Examples include multiciliated  
370 cells of the airway, choroid plexus, oviduct, and olfactory sensory neurons (Ching & Stearns,  
371 2020; Klos Dehring et al., 2013; Narita & Takeda, 2015; Spassky & Meunier, 2017). In most of  
372 these cell types the amplified centrioles form cilia, and the function of these cells is dependent  
373 on having multiple cilia (Ching & Stearns, 2020; Klos Dehring et al., 2013; Narita & Takeda,  
374 2015). TGCs do not form even a single primary cilium, so presumably the observed  
375 amplification is not related to cilium functions. A unique feature of TGC centriole formation is  
376 that it mostly occurs by the usual process of initiating one procentriole on the side of a mother  
377 centriole, but that the centriole pairs all disengage, separate and become centrosomes,  
378 maximizing the number of centrosomes. Might this greater number of centrosomes be related to  
379 the properties of TGCs? Recent reports show that the presence of extra centrosomes in  
380 mammalian cells causes a range of phenotypes, including increased invasiveness (Godinho &  
381 Pellman, 2014). Thus, a possible explanation for the function of the extra centrosomes in TGCs  
382 is that they aid in promoting the invasive phenotype of TGCs, which is critical to their ability to  
383 migrate into the placenta during pregnancy. Another possibility is that the extra centrosomes in  
384 TGCs are not necessary for TGC function, but instead are simply a byproduct of this form of  
385 endocycling. Whether extra centrosomes are required for the TGC function will require testing *in*  
386 *vivo*, using cell-type-specific genetic manipulation to block centriole formation.

387  
388 The centriole and centrosome events that we have observed in TGC endocycles bear a  
389 remarkable resemblance to those described in some mammalian cell types under prolonged S-  
390 phase arrest. Balczon, et al. (1995) showed that arrest of CHO cells in S-phase with  
391 hydroxyurea resulted in amplification of centrioles over several days. Subsequent work on this  
392 S-phase arrest amplification has shown that even among transformed cell lines this is not a  
393 universal property and instead seems to be associated with PLK1 activity during the prolonged  
394 arrest (Lončarek et al., 2010). Centrioles duplicated under these conditions often disengage and  
395 can become competent for further duplication (Balczon et al., 1995; Lončarek et al., 2010).  
396 Disengagement in a typical cell cycle is likely a multistep process, initiated in G2 and completed  
397 in late mitosis (Lončarek et al., 2010; Tsou & Stearns, 2006). However, in both the TGC  
398 endocycle and prolonged S-phase, arrest can occur without transiting mitosis. Also, in both cases  
399 disengagement can occur asynchronously with engaged centriole pairs separating hours apart  
400 (Lončarek et al., 2008). It remains to be determined what centriole-intrinsic factors in TGCs  
401 might be responsible for this asynchronous behavior in a common cytoplasm, but we note that  
402 there are many examples of localized phenomena in shared cytoplasm, such as the  
403 asynchronous division of nuclei in the filamentous phase of the fungus *Ashbya* (Gladfelter et al.,  
404 2006).  
405

406 In summary, we find that murine TGCs differentiating *in vitro* undergo endocycles that increase  
407 DNA content without substantially increasing centriole number in most cells beyond the normal  
408 S/G2 number of four. However, the centrioles that do exist are disengaged and separated and  
409 become centrosomes, such that most TGCs have four or more functional centrosomes. It will be  
410 of interest to determine whether the many other examples of genome amplification in  
411 differentiated cells are similar or different in regard to centrosome properties and the function  
412 they might provide.

413

#### 414 **Acknowledgements:**

415 This project was supported by the NIGMS of the National Institutes of Health under award  
416 numbers 1R35GM130286 (to T.S.) and T32GM007276 (to G.B and M.S.). We thank Julie  
417 Baker's lab for the gift of TS cells and all members of the Stearns lab for helpful feedback and  
418 suggestions.

419

#### 420 **Competing Interests:**

421 We do not declare any competing interests at this time.

422

#### 423 **Author Contributions:**

424

425 Conceptualization and writing: G.B., M.S., L.M., and T.S.; Investigation: G.B., M.S., and L.M.;  
426 Supervision, funding acquisition, and project management: T.S.

427

#### 428 **Materials and Methods:**

429

##### 430 *Ethics Statement*

431 This study uses samples from mice. All animal procedures in this study were approved by the  
432 Stanford University Administrative Panel for Laboratory Animal Care (SUAPLAC protocol  
433 11659) and carried out according to SUAPLAC guidelines.

434

435

##### 436 *Cell lines*

437 Mouse trophoblast stem cells (TSCs) were a gift from Julie C. Baker (Stanford University) and  
438 were maintained in DMEM-F12 with 15 mM HEPES (Gibco, Life Technologies, catalog #

439 11330032), 20% fetal bovine serum (Gemini Bioproducts, catalog #900-208, lot # A00G91I), 2  
440 mM Glutamax (Gibco, Life Technologies, catalog # 35050061), 100 µg/ml penicillin-  
441 streptomycin, 1 mM sodium pyruvate (HyClone, GE Healthcare Life Sciences, catalog #  
442 SH3023901), 100 µM β-mercaptoethanol, and 1X MEM nonessential amino acids,  
443 supplemented with 10 ng/ml Activin A (Peprotech, catalog # 120-14P), 25 ng/ml fibroblast  
444 growth factor 4 (FGF4, Peprotech, catalog #100-31), and 1 µg/ml heparin (Sigma-Aldrich), as  
445 described in (Chuong et al., 2013; Tanaka et al., 1999).

446  
447 To differentiate TSCs into parietal trophoblast giant cells (TGCs), TSCs were seeded at  $2.5 \times 10^4$   
448 cells per well in 6-well or 12-well plates. The following day, TSCs were differentiated into TGCs  
449 by removing the FGF4, Activin A, and heparin from growth media, and replacing with 5 µM  
450 retinoic acid. TGCs were maintained for up to 10 days in culture, where media was changed  
451 every two days.

452  
453

#### 454 *Mouse husbandry and derivation of TSCs*

455 Arl13b-mCherry;eGFP-centrin2 transgenic mice (JAX#027967) were obtained from JAX  
456 laboratories, which were generated by (Bangs et al., 2015) on FVB and C3H mixed background.  
457 All procedures involving animals were approved by the Institutional Animal Care and Use  
458 Committee of Stanford University School of Medicine in accordance with established guidelines  
459 for animal care. Breeding pairs were mated to establish timed pregnancies. Copulation was  
460 determined by the presence of a vaginal plug the morning after mating, and embryonic day 0.5  
461 (e0.5) was defined as noon of that day. Embryos ranging from e3.5d to e9.5d, as well as adult  
462 males and females for breeding between 8 weeks and 9 months were used for this study.

463  
464 Arl13b-mCherry;eGFP-centrin2 TSCs were derived from mouse blastocysts isolated from  
465 pregnant mice at e3.5d as described by (Kidder, 2014; Tanaka, 2006). Initially, blastocysts  
466 were seeded onto a feeder layer of irradiated mouse embryonic fibroblasts (iMEFs) after  
467 isolation, then observed for an outgrowth of cells. Arl13b-mCherry;eGFP-centrin2 TSCs were  
468 maintained in the same growth conditions as TSCs stated above. Fetal bovine serum used for  
469 TSC derivation and maintenance was purchased from HyClone (GE Healthcare Life Sciences,  
470 catalog # SH30070.02, lot# AC1024054S).

471  
472

#### 473 *Immunofluorescence and immunohistochemistry*

474 TSCs and TGCs were grown on poly-L-lysine-coated #1.5 glass coverslips (Electron  
475 Microscopy Sciences, Hatfield, PA) for confocal microscopy. TSCs and TGCs were washed with  
476 phosphate buffered saline (PBS), fixed in -20°C methanol for 10 minutes, washed three times  
477 with PBS, then blocked in 3% bovine serum albumin (BSA), 0.1% Triton X-100, and 0.02%  
478 sodium azide in PBS (PBS-BT) for 30 minutes to 1 hour at room temperature. Samples were  
479 then incubated with primary antibodies overnight at 4°C. The following day, samples were  
480 washed three times in PBS-BT, then incubated with Alexa Fluor dye-conjugated secondary  
481 antibodies (Invitrogen) diluted 1:1,000 in PBS-BT for 1 hour at room temperature. When  
482 applicable, appropriate isotype-specific secondary antibodies were used to distinguish different

483 monoclonal mouse antibodies. Samples were then stained with 5 µg/ml DAPI (4',6-diamidino-2-  
484 phenylindole) for two minutes to visualize nuclei and mounted in Mowiol mounting medium  
485 (Polysciences) in glycerol containing 2.5% 1,4-diazabicyclo-(2,2,2)-octane (DABCO, Sigma-  
486 Aldrich) antifade.

487  
488 The conceptus was isolated from a pregnant mouse at e9.5d and fixed in 4% paraformaldehyde  
489 at 4°C overnight. The conceptus was then washed three times in PBS, incubated in 30%  
490 sucrose at 4°C overnight for cryoprotection, embedded in OCT compound and frozen at -80°C.  
491 The conceptus was then cryosectioned at 10 µm thick sections. For immunohistochemistry,  
492 tissue was rehydrated with 1% normal goat serum in PBS for 30 minutes at room temperature.  
493 Nuclei were stained using DAPI as indicated in the immunofluorescence protocol above.

494

495

#### 496 *Antibodies*

497 Primary antibodies used were mouse monoclonal anti-γ-tubulin (Sigma-Aldrich, clone GTU88,  
498 IgG1; used at 1:5,000 dilution in PBS-BT), mouse monoclonal anti-centrin3 (Novus Biologicals,  
499 clone 93E6, IgG2b; 1:2,000), mouse monoclonal anti-α-tubulin (Abcam, clone DM1α, IgG1;  
500 1:4,000, St. Louis, MO), mouse monoclonal anti-centrin (Sigma-Aldrich, clone 20H5, IgG2a;  
501 1:200), mouse monoclonal anti-acetylated tubulin (Sigma-Aldrich, clone 6-11B-1, 1:1000) rabbit  
502 polyclonal anti-POC5 (A303-341A-T, Bethyl Laboratories, 1:500), rabbit polyclonal anti-CP110  
503 (12780-1-AP, Proteintech, 1:200), rabbit polyclonal anti-CNAP1/Cep250 (Proteintech, 14498-1-  
504 AP, 1:500), rabbit polyclonal anti-Pericentrin (Abcam, ab4448, 1:500), rabbit polyclonal anti-  
505 CDK5RAP2 (Sigma-Aldrich, 06-1398, 1:1000), and rabbit polyclonal anti-Cep164 (purified from  
506 serum of immunized animals as described in (Lau et al., 2012), 1:1,000).

507

508

#### 509 *Drug treatments, EdU labeling and Centrinone-B treatment*

510 For inhibition of centriole duplication experiments, 400 nM Centrinone-B, or the equivalent  
511 volume of DMSO as a vehicle control were added to TSCs upon inducing differentiation. TGCs  
512 were maintained in the presence of these treatments throughout the duration of the time course.  
513 10 µM EdU (5-ethynyl-2'-deoxyuridine) was added 24 hours before the termination of a time  
514 course at day 5 post-differentiation to examine if DNA replication occurred during drug  
515 treatment. Staining for EdU incorporation was conducted using Click-iT® EdU Alexa Fluor® 594  
516 Imaging Kit (Life Technologies, catalog #C10339), followed by immunofluorescence as  
517 mentioned above.

518

519

#### 520 *Microtubule regrowth assay*

521 TSCs were seeded onto coverslips at 5x10<sup>4</sup> cells in 3.5 cm dishes and differentiated the  
522 following day. To depolymerize microtubules, cells were treated with 10 µg/ml nocodazole for 1  
523 hour at 37°C. Cells were then washed with ice cold PBS on ice. Microtubule regrowth was then  
524 initiated when coverslips were incubated with medium warmed at 37°C. To stop the assay, cells  
525 were fixed with 100% methanol for 10 minutes at -20°C at the respective time points before  
526 proceeding with immunofluorescence as described above.

527

528

529 *Confocal Microscopy and live cell imaging*

530 Confocal microscopy images were acquired as Z-stacks collected at 0.5- $\mu\text{m}$  intervals across a  
531 15 – 30  $\mu\text{m}$  range for fixed cells on a Zeiss Axio Observer microscope (Carl Zeiss) with a  
532 confocal spinning-disk head (Yokogawa Electric Corporation, Tokyo, Japan), PlanApoChromat  
533 63 $\times$ /1.4 NA objective, and a Cascade II:512 electron-multiplying (EM) CCD camera  
534 (Photometrics, Tucson, AZ) or PRIME: BSI backside illuminated CMOS camera run with  $\mu$ -  
535 Manager software (Edelstein et al., 2014) or SlideBook 6 software (3i, Denver, CO).

536

537 Confocal microscopy images for fixed cells were also acquired using a Leica SP8 scanning  
538 confocal microscope with a 63  $\times$  (1.4 N.A.) objective at the same Z-stack parameters listed  
539 previously. All images were processed using Fiji (National Institutes of Health, Bethesda, MD)  
540 and/or SlideBook (3i, Denver, CO).

541

542 The medium was changed 1 hour prior to imaging to phenol-free DMEM-F12 with 15 mM  
543 HEPES supplemented with 20% fetal bovine serum, 100  $\mu\text{g}/\text{ml}$  penicillin-streptomycin, 1 mM  
544 sodium pyruvate, 100  $\mu\text{M}$   $\beta$ -mercaptoethanol, 1X MEM nonessential amino acids, and 5  $\mu\text{M}$   
545 retinoic acid. During image acquisition, cells were incubated at 37°C under 5% CO<sub>2</sub>. Images  
546 were acquired as 0.5  $\mu\text{m}$  Z-stacks collected every 5 or 10 min for up to 72 hours using a Zeiss  
547 Axio Observer microscope (Carl Zeiss) with a confocal spinning-disk head (Yokogawa Electric  
548 Corporation, Tokyo, Japan), PRIME: BSI backside illuminated CMOS camera run with  $\mu$ -  
549 Manager software (Edelstein et al., 2014) or SlideBook 6 software (3i, Denver, CO).

550

551 *Expansion Microscopy*

552 Expansion microscopy was performed according to the previously described U-ExM protocol  
553 (Gambiarotto et al., 2019). In brief, TGC cultures on coverslips were fixed in ice cold methanol  
554 and incubated for 10 minutes at  $-20^{\circ}\text{C}$  for 10 min, then washed with 1 $\times$  PBS. PBS was  
555 removed and cells were incubated in monomer fixative solution (0.7% formaldehyde and 1% w/v  
556 acrylamide in water) for 4-5 hr at 37°C. Coverslips were then inverted onto droplets of cold  
557 gelation solution (19% w/v sodium acrylate, 10% w/v acrylamide, 0.1% BIS, 0.5% TEMED, 0.5%  
558 ammonium persulfate in PBS) and allowed to set for 5 min on ice. Coverslips were then  
559 transferred to 37°C for 1 hr. Coverslips with gels were incubated in denaturation buffer (200 mM  
560 SDS, 200 mM NaCl, and 50 mM Tris in water) for 15 minutes at RT to allow the gel to detach  
561 from the cover slip and then the gel was transferred to a 1.5ml Eppendorf with denaturation  
562 buffer for 45 min at 95°C. Gels were removed from the Eppendorf and washed in water twice for  
563 five minutes and then expanded in water overnight. Gels were then incubated in PBS-BT for 30  
564 min prior to any staining. Gels were incubated in primary antibody solution in PBS-BT on a  
565 nutator for 3-4 hr to overnight. Next, gels were washed three times in PBS for 10–30 min per  
566 wash and then incubated in a solution of secondary antibodies conjugated to Alexa Fluors plus  
567 DAPI, diluted 1:1000, overnight at 4°C. Gels were washed in PBS for at least 30 min, then in  
568 water three times for 10 min per wash. Gels were then allowed to fully expand in water for at  
569 least an hour before mounting in a glass-bottom imaging dish and imaging by spinning disk  
570 confocal microscopy.

571  
572  
573  
574  
575  
576  
577  
578  
579  
580  
581  
582  
583  
584  
585  
586  
587  
588  
589  
590  
591  
592  
593  
594  
595  
596  
597  
598  
599  
600  
601  
602  
603  
604  
605  
606  
607  
608

*Quantification of nuclear area and statistical analyses*

Nuclear area and integrated DAPI measurements of mononucleate TGCs were quantified using either maximum intensity or sum projections of stacks acquired by confocal microscopy. Nuclei watershed separation was generated in Fiji on DAPI-stained nuclei as stated on imagej.net ([https://imagej.net/Nuclei Watershed Separation](https://imagej.net/Nuclei_Watershed_Separation)). Briefly, a Gaussian Blur 3D filter was applied with a sigma value of 3.0 pixels in x, y, and z. Automated threshold plus watershedding was applied to separate individual nuclei. Nuclear area particle analysis parameters were the following: size- 50 to 2,000  $\mu\text{m}^2$ , as reported in (Simmons et al., 2007), and circularity- 0.0 to 1.0. If necessary, the upper limit of nuclear area was increased to 5,000  $\mu\text{m}^2$ . If a single nucleus was segmented into multiple pieces, the area of each segment was added to quantify the nuclear area of the entire nucleus. Nuclei on the edges of the field of view, in addition to binucleate and multinucleate syncytiotrophoblasts, were excluded from analysis (Fig S1A).

Statistical analyses and graphs were generated using GraphPad Prism 9 Software. Pairwise comparisons were made using a one-way ANOVA test. For multiple comparisons, a Dunnett's test was applied to correct for multiple hypothesis testing. For all analyses, a p-value less than 0.05 was considered significant. Error bars on graphs represent standard error of the mean (SEM), and horizontal lines represent the mean.

*Quantitative real time PCR*

RNA was extracted using phenol-chloroform extraction (TriZOL® Reagent, Invitrogen, catalog # 15596-026) from TGCs initially seeded at  $2.5 \times 10^4$  cells per well in 6-well plates at various time points throughout the differentiation time course indicated. cDNA was prepared from total RNA using Maxima First Strand cDNA Synthesis Kit (Life Technologies, catalog #K1641). qPCR was performed in triplicate with Luna® Universal qPCR SYBR Green Master Mix (New England BioLabs, catalog #M3003L), where 25 ng cDNA was loaded per well. Gene expression was evaluated using the  $\Delta\Delta\text{Ct}$  method (Schmittgen and Livak, 2008). Gapdh levels were used to normalize target gene expression values. For TGC differentiation time courses, gene expression levels were compared to TGCs collected at the beginning of differentiation (t=0d). For validation of derived TSCs from Arl13b-mCherry;eGFP-centrin2 mice, gene expression levels were normalized to TSCs not derived in this paper.

Primers were validated as intron-spanning using PrimerBLAST (NCBI). Primer sequences are indicated below. N/A: not applicable, designed by author using PrimerBLAST-

| Target Gene | Forward primer (5'-3') | Reverse primer (5'-3')  | Reference |
|-------------|------------------------|-------------------------|-----------|
| Gapdh       | AGGTCGGTGTGAACGGATTTG  | TGTAGACCATGTAGTTGAGGTCA | N/A       |

|        |                     |                    |                      |
|--------|---------------------|--------------------|----------------------|
| Prl3d1 | CTGCTGACATTA AGGGCA | AACAAAGACCATGTGGGC | Rai and Cross, 2015. |
|--------|---------------------|--------------------|----------------------|

609

610

611 **References:**

- 612 Balczon, R., Bao, L., Zimmer, W. E., Brown, K., Zinkowski, R. P., & Brinkley, B. R. (1995).  
613 Dissociation of centrosome replication events from cycles of DNA synthesis and mitotic  
614 division in hydroxyurea-arrested Chinese hamster ovary cells. *Journal of Cell Biology*,  
615 *130*(1), 105–115. <https://doi.org/10.1083/jcb.130.1.105>
- 616 Bangs, F. K., Schrode, N., Hadjantonakis, A. K., & Anderson, K. v. (2015). Lineage specificity of  
617 primary cilia in the mouse embryo. *Nature Cell Biology*, *17*(2), 113–122.  
618 <https://doi.org/10.1038/ncb3091>
- 619 Basto, R., Brunk, K., Vinadogrova, T., Peel, N., Franz, A., Khodjakov, A., & Raff, J. W. (2008).  
620 Centrosome Amplification Can Initiate Tumorigenesis in Flies. *Cell*, *133*(6), 1032–1042.  
621 <https://doi.org/10.1016/j.cell.2008.05.039>
- 622 Carney, E. W., Prideaux, V., Lye, S. J., & Rossant, J. (1993). Progressive Expression of  
623 Trophoblast-Specific Genes During Formation of Mouse Trophoblast Giant Cells In Vitro. In  
624 *MOLECULAR REPRODUCTION AND DEVELOPMENT* (Vol. 34357468).
- 625 Ching, K., & Stearns, T. (2020). Centrioles are amplified in cycling progenitors of olfactory  
626 sensory neurons. *PLoS Biology*, *18*(9). <https://doi.org/10.1371/journal.pbio.3000852>
- 627 Chuong, E., Rumi, M., Soares, M. et al. Endogenous retroviruses function as species-specific  
628 enhancer elements in the placenta. *Nat Genet* *45*, 325–329 (2013).  
629 <https://doi.org/10.1038/ng.2553>
- 630 Cross, J. C. (2005). How to make a placenta: Mechanisms of trophoblast cell differentiation in  
631 mice - A Review. *Placenta*, *26* (SUPPL.). <https://doi.org/10.1016/j.placenta.2005.01.015>
- 632 Denu, R. A., Zasadil, L. M., Kanugh, C., Laffin, J., Weaver, B. A., & Burkard, M. E. (2016).  
633 Centrosome amplification induces high grade features and is prognostic of worse  
634 outcomes in breast cancer. *BMC Cancer*, *16*(1). <https://doi.org/10.1186/s12885-016-2083-x>
- 635 Edelstein, A. D., Tsuchida, M. A., Amodaj, N., Pinkard, H., Vale, R. D., & Stuurman, N. (2014).  
636 Advanced methods of microscope control using  $\mu$ Manager software. *Journal of Biological*  
637 *Methods*, *1*(2), e10. <https://doi.org/10.14440/jbm.2014.36>
- 638 Edgar, B. A., Zielke, N., & Gutierrez, C. (2014). Endocycles: A recurrent evolutionary innovation  
639 for post-mitotic cell growth. In *Nature Reviews Molecular Cell Biology* (Vol. 15, Issue 3, pp.  
640 197–210). <https://doi.org/10.1038/nrm3756>
- 641 Gambarotto, D., Hamel, V., & Guichard, P. (2021). Chapter 4 - Ultrastructure expansion  
642 microscopy (U-ExM). In P. Guichard & V. Hamel (Eds.), *Expansion Microscopy for Cell*  
643 *Biology* (Vol. 161, pp. 57–81). Academic Press.  
644 <https://doi.org/https://doi.org/10.1016/bs.mcb.2020.05.006>
- 645 Gambarotto, D., Zwettler, F. U., le Guennec, M., Schmidt-Cernohorska, M., Fortun, D., Borgers,  
646 S., Heine, J., Schloetel, J.-G., Reuss, M., Unser, M., Boyden, E. S., Sauer, M., Hamel, V.,



- 647 & Guichard, P. (2019). Imaging cellular ultrastructures using expansion microscopy (U-  
648 ExM). *Nature Methods*, 16(1), 71–74. <https://doi.org/10.1038/s41592-018-0238-1>
- 649 Gladfelter, A. S., Hungerbuehler, A. K., & Philippsen, P. (2006). Asynchronous nuclear division  
650 cycles in multinucleated cells. *Journal of Cell Biology*, 172(3), 347–362.  
651 <https://doi.org/10.1083/jcb.200507003>
- 652 Godinho, S. A., & Pellman, D. (2014). Causes and consequences of centrosome abnormalities  
653 in cancer. In *Philosophical Transactions of the Royal Society B: Biological Sciences* (Vol.  
654 369, Issue 1650). Royal Society of London. <https://doi.org/10.1098/rstb.2013.0467>
- 655 Hannibal, R. L., & Baker, J. C. (2016). Selective Amplification of the Genome Surrounding Key  
656 Placental Genes in Trophoblast Giant Cells. *Current Biology*, 26(2), 230–236.  
657 <https://doi.org/10.1016/j.cub.2015.11.060>
- 658 Hemberger, M., Hughes, M., & Cross, J. C. (2004). Trophoblast stem cells differentiate in vitro  
659 into invasive trophoblast giant cells. *Developmental Biology*, 271(2), 362–371.  
660 <https://doi.org/10.1016/j.ydbio.2004.03.040>
- 661 Holland, A. J., Fachinetti, D., Zhu, Q., Bauer, M., Verma, I. M., Nigg, E. A., & Cleveland, D. W.  
662 (2012). The autoregulated instability of Polo-like kinase 4 limits centrosome duplication to  
663 once per cell cycle. *Genes and Development*, 26(24), 2684–2689.  
664 <https://doi.org/10.1101/gad.207027.112>
- 665 Izquierdo, D., Wang, W. J., Uryu, K., & Tsou, M. F. B. (2014). Stabilization of cartwheel-less  
666 centrioles for duplication requires CEP295-mediated centriole-to-centrosome conversion.  
667 *Cell Reports*, 8(4), 957–965. <https://doi.org/10.1016/j.celrep.2014.07.022>
- 668 Kidder, B. L. (2014). Derivation and manipulation of trophoblast stem cells from mouse  
669 blastocysts. *Methods in Molecular Biology*, 1150, 201–212. [https://doi.org/10.1007/978-1-4939-0512-6\\_13](https://doi.org/10.1007/978-1-4939-0512-6_13)
- 670
- 671 Klisch, K., Schraner, E. M., & Boos, A. (2017). Centrosome Clustering in the Development of  
672 Bovine Binucleate Trophoblast Giant Cells. *Cells Tissues Organs*, 203(5), 287–294.  
673 <https://doi.org/10.1159/000452271>
- 674 KlosDehring, D. A., Vldar, E. K., Werner, M. E., Mitchell, J. W., Hwang, P., & Mitchell, B. J.  
675 (2013). Deuterosome-Mediated Centriole Biogenesis. *Developmental Cell*, 27(1), 103–112.  
676 <https://doi.org/10.1016/j.devcel.2013.08.021>
- 677 Kong, D., Farmer, V., Shukla, A., James, J., Gruskin, R., Kiriya, S., & Loncarek, J. (2014).  
678 Centriole maturation requires regulated Plk1 activity during two consecutive cell cycles.  
679 *Journal of Cell Biology*, 206(7), 855–865. <https://doi.org/10.1083/jcb.201407087>
- 680 Kyrousi, C., Arbi, M., Pilz, G. A., Pefani, D. E., Lalioti, M. E., Ninkovic, J., Götz, M., Lygerou, Z.,  
681 & Taraviras, S. (2015). Mcdas and gemc1 are key regulators for the generation of  
682 multiciliated ependymal cells in the adult neurogenic niche. *Development (Cambridge)*,  
683 142(21), 3661–3674. <https://doi.org/10.1242/dev.126342>
- 684 Lambrus, B. G., Uetake, Y., Clutario, K. M., Daggubati, V., Snyder, M., Sluder, G., & Holland, A.  
685 J. (2015). P53 protects against genome instability following centriole duplication failure.  
686 *Journal of Cell Biology*, 210(1), 63–77. <https://doi.org/10.1083/jcb.201502089>
- 687 Lau, L., Lee, Y. L., Sahl, S. J., Stearns, T., & Moerner, W. E. (2012). STED microscopy with  
688 optimized labeling density reveals 9-fold arrangement of a centriole protein. *Biophysical*  
689 *Journal*, 102(12), 2926–2935. <https://doi.org/10.1016/j.bpj.2012.05.015>

- 690 Lončarek, J., Hergert, P., & Khodjakov, A. (2010). Centriole reduplication during prolonged  
691 interphase requires procentriole maturation governed by plk1. *Current Biology*, 20(14),  
692 1277–1282. <https://doi.org/10.1016/j.cub.2010.05.050>
- 693 Loncarek, J., Hergert, P., Magidson, V., & Khodjakov, A. (2008). Control of daughter centriole  
694 formation by the pericentriolar material. *Nature Cell Biology*, 10(3), 322–328.  
695 <https://doi.org/10.1038/ncb1694>
- 696 Macauley, A., Cross, J. C., Werb, Z., & Samuel, †. (1998). Reprogramming the Cell Cycle for  
697 Endoreduplication in Rodent Trophoblast Cells. In *Molecular Biology of the Cell* (Vol. 9).
- 698 Mahjoub, M. R., & Stearns, T. (2012). Supernumerary centrosomes nucleate extra cilia and  
699 compromise primary cilium signaling. *Current Biology*, 22(17), 1628–1634.  
700 <https://doi.org/10.1016/j.cub.2012.06.057>
- 701 Maltepe, E., & Fisher, S. J. (2015). Placenta: The Forgotten Organ. *Annual Review of Cell and*  
702 *Developmental Biology*, 31, 523–552. <https://doi.org/10.1146/annurev-cellbio-100814-125620>
- 704 Maldonado-Estrada, J., Menu, E., Roques, P., Barré-Sinoussi, F., & Chauat, G. (2004).  
705 Evaluation of Cytokeratin 7 as an accurate intracellular marker with which to assess the  
706 purity of human placental villous trophoblast cells by flow cytometry. *Journal of*  
707 *immunological methods*, 286(1-2), 21-34.
- 708 Martindill, D. M. J., Risebro, C. A., Smart, N., Franco-Viseras, M. D. M., Rosario, C. O.,  
709 Swallow, C. J., Dennis, J. W., & Riley, P. R. (2007). Nucleolar release of Hand1 acts as a  
710 molecular switch to determine cell fate. *Nature Cell Biology*, 9(10), 1131–1141.  
711 <https://doi.org/10.1038/ncb1633>
- 712 Morimoto H, Ueno M, Tanabe H, Kono T, Ogawa H (2021) Progesterone depletion results in  
713 Lamin B1 loss and induction of cell death in mouse trophoblast giant cells. *PLOS ONE*  
714 16(7): e0254674. <https://doi.org/10.1371/journal.pone.0254674>
- 715 Narita, K., & Takeda, S. (2015). Cilia in the choroid plexus: their roles in hydrocephalus and  
716 beyond. *Frontiers in Cellular Neuroscience*, 9. <https://doi.org/10.3389/fncel.2015.00039>
- 717 Nigg, E. A., & Holland, A. J. (2018). Once and only once: Mechanisms of centriole duplication  
718 and their deregulation in diseases. In *Nature Reviews Molecular Cell Biology* (Vol. 19,  
719 Issue 5, pp. 297–312). Nature Publishing Group. <https://doi.org/10.1038/nrm.2017.127>
- 720 Nigg, E. A., & Stearns, T. (2011). The centrosome cycle: Centriole biogenesis, duplication and  
721 inherent asymmetries. In *Nature Cell Biology* (Vol. 13, Issue 10, pp. 1154–1160).  
722 <https://doi.org/10.1038/ncb2345>
- 723 Rai, A., & Cross, J. C. (2015). Three-dimensional cultures of trophoblast stem cells  
724 autonomously develop vascular-like spaces lined by trophoblast giant cells. *Developmental*  
725 *Biology*, 398(1), 110–119. <https://doi.org/10.1016/j.ydbio.2014.11.023>
- 726 Raj, A., & van Oudenaarden, A. (2008). Nature, Nurture, or Chance: Stochastic Gene  
727 Expression and Its Consequences. In *Cell* (Vol. 135, Issue 2, pp. 216–226). Elsevier B.V.  
728 <https://doi.org/10.1016/j.cell.2008.09.050>
- 729 Roukos, V., Pegoraro, G., Voss, T. C., & Misteli, T. (2015). Cell cycle staging of individual cells  
730 by fluorescence microscopy. *Nature Protocols*, 10(2), 334–348.  
731 <https://doi.org/10.1038/nprot.2015.016>
- 732 Sakaue-Sawano, A., Hoshida, T., Yo, M., Takahashi, R., Ohtawa, K., Arai, T., Takahashi, E.,  
733 Noda, S., Miyoshi, H., & Miyawaki, A. (2013). Visualizing developmentally programmed

- 734 endoreplication in mammals using ubiquitin oscillators. *Development (Cambridge)*,  
735 140(22), 4624–4632. <https://doi.org/10.1242/dev.099226>
- 736 Schoenfelder, K. P., Montague, R. A., Paramore, S. v., Lennox, A. L., Mahowald, A. P., & Fox,  
737 D. T. (2014). Indispensable pre-mitotic endocycles promote aneuploidy in the *Drosophila*  
738 rectum. *Development (Cambridge)*, 141(18), 3551–3560.  
739 <https://doi.org/10.1242/dev.109850>
- 740 Schmittgen, T., Livak, K. Analyzing real-time PCR data by the comparative CT method. *Nat*  
741 *Protoc* 3, 1101–1108 (2008). <https://doi.org/10.1038/nprot.2008.73>
- 742 Schweizer, N., Haren, L., Dutto, I., Viais, R., Lacasa, C., Merdes, A., & Lüders, J. (2021). Sub-  
743 centrosomal mapping identifies augmin- $\gamma$ TuRC as part of a centriole-stabilizing scaffold.  
744 *Nature Communications*, 12(1). <https://doi.org/10.1038/s41467-021-26252-5>
- 745 Sillibourne, J. E., & Bornens, M. (2010). *Polo-like kinase 4: the odd one out of the family*.  
746 <http://www.celldiv.com/content/5/1/25>
- 747 Silva, J. F., & Serakides, R. (2016). Intrauterine trophoblast migration: A comparative view of  
748 humans and rodents. In *Cell Adhesion and Migration* (Vol. 10, Issues 1–2, pp. 88–110).  
749 Taylor and Francis Inc. <https://doi.org/10.1080/19336918.2015.1120397>
- 750 Simmons, D. G., & Cross, J. C. (2005). Determinants of trophoblast lineage and cell subtype  
751 specification in the mouse placenta. In *Developmental Biology* (Vol. 284, Issue 1, pp. 12–  
752 24). Academic Press Inc. <https://doi.org/10.1016/j.ydbio.2005.05.010>
- 753 Simmons, D. G., Fortier, A. L., & Cross, J. C. (2007). Diverse subtypes and developmental  
754 origins of trophoblast giant cells in the mouse placenta. *Developmental Biology*, 304(2),  
755 567–578. <https://doi.org/10.1016/j.ydbio.2007.01.009>
- 756 Spassky, N., & Meunier, A. (2017). The development and functions of multiciliated epithelia. In  
757 *Nature Reviews Molecular Cell Biology* (Vol. 18, Issue 7, pp. 423–436). Nature Publishing  
758 Group. <https://doi.org/10.1038/nrm.2017.21>
- 759 Tanaka, S. (2006). Derivation and Culture of Mouse Trophoblast Stem Cells In Vitro. In K.  
760 Turksen (Ed.), *Embryonic Stem Cell Protocols: Volume 1: Isolation and Characterization*  
761 (pp. 35–44). Humana Press. <https://doi.org/10.1385/1-59745-037-5:35>
- 762 Tsou, M. F. B., & Stearns, T. (2006). Mechanism limiting centrosome duplication to once per cell  
763 cycle. *Nature*, 442(7105), 947–951. <https://doi.org/10.1038/nature04985>
- 764 Ullah, R., Naz, A., Akram, H. S., Ullah, Z., Tariq, M., Mithani, A., & Faisal, A. (2020).  
765 Transcriptomic analysis reveals differential gene expression, alternative splicing, and novel  
766 exons during mouse trophoblast stem cell differentiation. *Stem Cell Research and Therapy*,  
767 11(1). <https://doi.org/10.1186/s13287-020-01848-8>
- 768 Ullah, Z., Kohn, M. J., Yagi, R., Vassilev, L. T., & DePamphilis, M. L. (2008). Differentiation of  
769 trophoblast stem cells into giant cells is triggered by p57/Kip2 inhibition of CDK1 activity.  
770 *Genes and Development*, 22(21), 3024–3026. <https://doi.org/10.1101/gad.1718108>
- 771 Vanderlaan, M., Steele, V., & Nettesheim, P. (1983). Increased DNA content as an early marker  
772 of transformation in carcinogen-exposed rat tracheal cell cultures. *Carcinogenesis*, 4(6),  
773 721–727. <https://doi.org/10.1093/carcin/4.6.721>
- 774 Vldar, E. K., & Stearns, T. (2007). Molecular characterization of centriole assembly in ciliated  
775 epithelial cells. *Journal of Cell Biology*, 178(1), 31–42.  
776 <https://doi.org/10.1083/jcb.200703064>

- 777 Vladar, E. K., Stratton, M. B., Saal, M. L., Salazar-De Simone, G., Wang, X., Wolgemuth, D.,  
778 Stearns, T., & Axelrod, J. D. (2018). Cyclin-dependent kinase control of motile ciliogenesis.  
779 *ELife*, 7, e36375. <https://doi.org/10.7554/eLife.36375>
- 780 Wang, G., Jiang, Q., & Zhang, C. (2014). The role of mitotic kinases in coupling the centrosome  
781 cycle with the assembly of the mitotic spindle. In *Journal of Cell Science* (Vol. 127, Issue  
782 19, pp. 4111–4122). Company of Biologists Ltd. <https://doi.org/10.1242/jcs.151753>
- 783 Wang, W. J., Soni, R. K., Uryu, K., & Tsou, M. F. B. (2011). The conversion of centrioles to  
784 centrosomes: Essential coupling of duplication with segregation. *Journal of Cell Biology*,  
785 193(4), 727–739. <https://doi.org/10.1083/jcb.201101109>
- 786 Wassie, A. T., Zhao, Y., & Boyden, E. S. (2019). Expansion microscopy: principles and uses in  
787 biological research. *Nature Methods*, 16(1), 33–41. [https://doi.org/10.1038/s41592-018-](https://doi.org/10.1038/s41592-018-0219-4)  
788 0219-4
- 789 Wong, Y. L., Anzola, J. v., Davis, R. L., Yoon, M., Motamedi, A., Kroll, A., Seo, C. P., Hsia, J. E.,  
790 Kim, S. K., Mitchell, J. W., Mitchell, B. J., Desai, A., Gahman, T. C., Shiau, A. K., &  
791 Oegema, K. (2015). Reversible centriole depletion with an inhibitor of Polo-like kinase 4.  
792 *Science*, 348(6239), 1155–1160. <https://doi.org/10.1126/science.aaa5111>
- 793 Yan, J., Tanaka, S., Oda, M., Makino, T., Ohgane, J., & Shiota, K. (2001). Retinoic acid  
794 promotes differentiation of trophoblast stem cells to a giant cell fate. *Developmental*  
795 *Biology*, 235(2), 422–432. <https://doi.org/10.1006/dbio.2001.0300>
- 796 Zybina, T. G., & Zybina, E. v. (2005). Cell reproduction and genome multiplication in the  
797 proliferative and invasive trophoblast cell populations of mammalian placenta. In *Cell*  
798 *Biology International* (Vol. 29, Issue 12, pp. 1071–1083).  
799 <https://doi.org/10.1016/j.cellbi.2005.10.015>
- 800 Zybina, E. v., & Zybina, T. G. (1996). *Polytene Chromosomes in Mammalian Cells*. *Int Rev Cytol.*  
801 1996; 165:53-119. doi: 10.1016/s0074-7696(08)62220-2. PMID: 8900957  
802

Figure 1

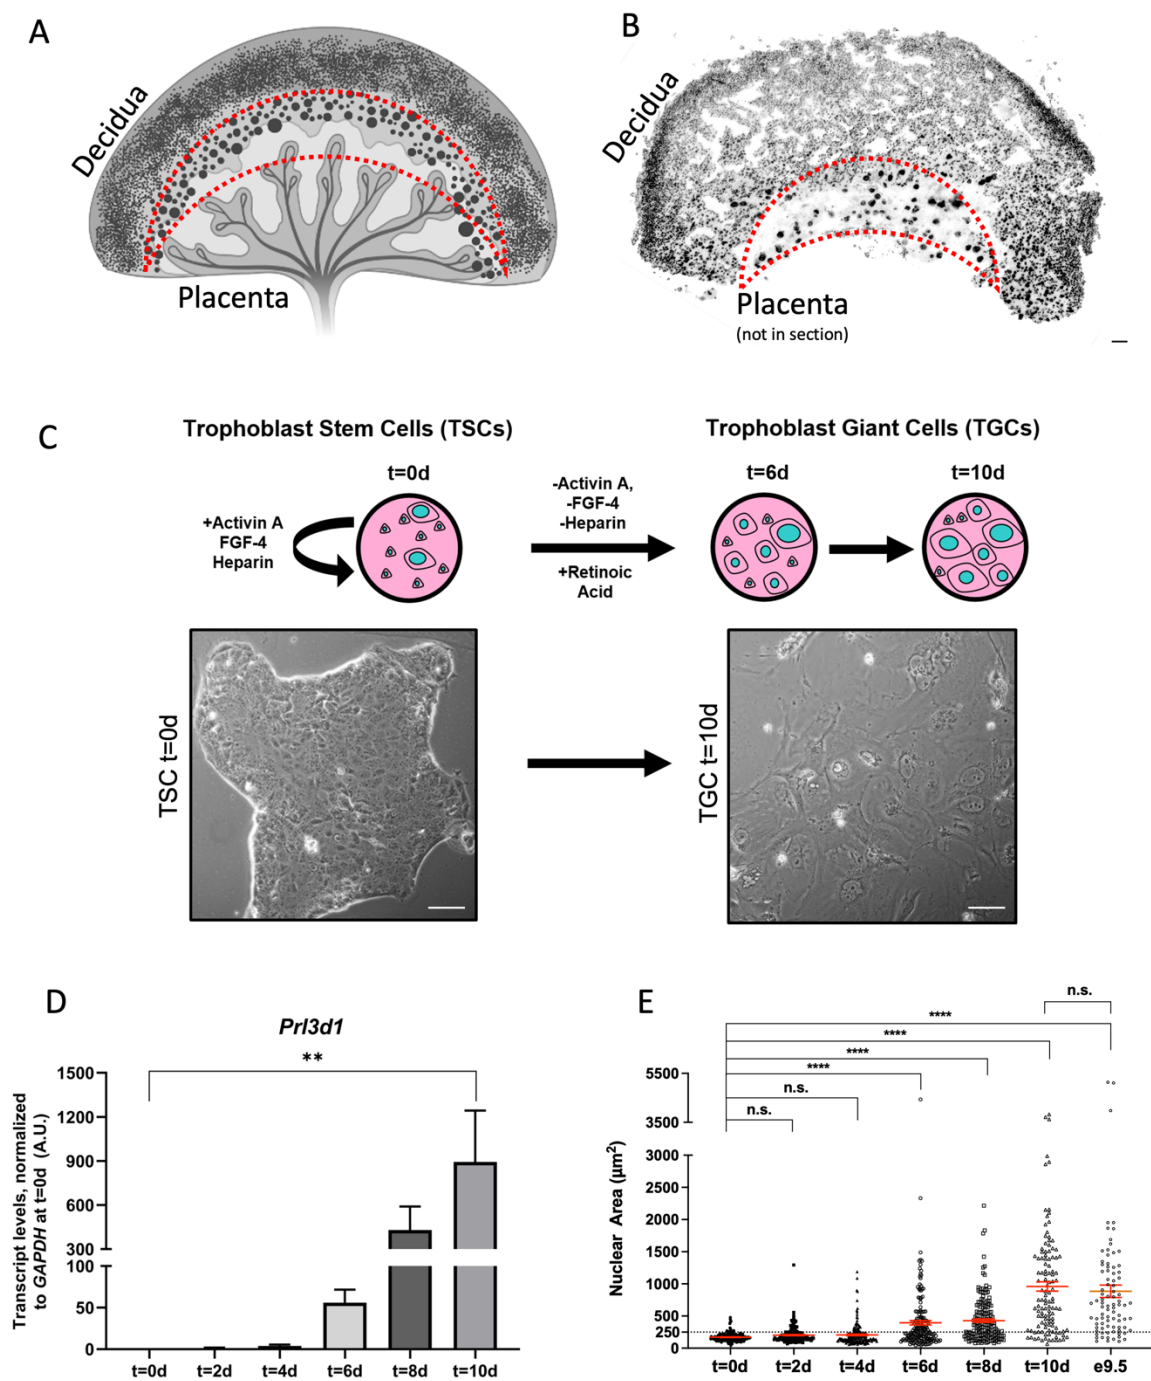

**Figure 1:** Trophoblast Stem Cells can be propagated and differentiated into TGCs *in vitro*:

- A. Diagram of the developing mouse placenta (light grey and vasculature) and decidua (dark gray), with the layer of TGCs outlined in red. Graphic was created with Biorender.com.
- B. Widefield image of a tissue section of conceptus at e9.5 stained with DAPI; layer of TGCs, characterized by large nuclei, is outlined in red. Scale bar = 100  $\mu\text{m}$
- C. Schematic of trophoblast giant cell (TGC) differentiation time course for detailed protocol, see Methods. TSCs were differentiated into TGCs for up to 10 days, with a time point collected every two days. The t=0d time point was collected at the beginning of differentiation, thus cells at t=0d are also considered to be TSCs. Note that TGC differentiation is an asynchronous process, and there may be TGCs with large nuclei present at the beginning of differentiation, as indicated in the schematic. Phase images of TSCs (left) and TGCs (right) show clear morphological differences of the two cultures. Scale bar: 50  $\mu\text{m}$ .
- D. To validate TGC differentiation over the time course, expression of TGC-specific lactogen *Prl3d1* was evaluated by quantitative real time-PCR. Data were collected in four independent experiments. *Gapdh* probe was used to normalize samples, expression is relative to time t=0d \*\*p-value  $\leq 0.01$
- E. Quantification of nuclear area throughout TGC differentiation shows a gradual increase in size of nuclei. Graph shows average nuclear area (mean plus the standard error of the mean) measured during *in vitro* differentiation time course. Data were collected in three independent experiments. \*\*\*\*p-value  $\leq 0.0001$ , n.s., not significant.

Figure 2

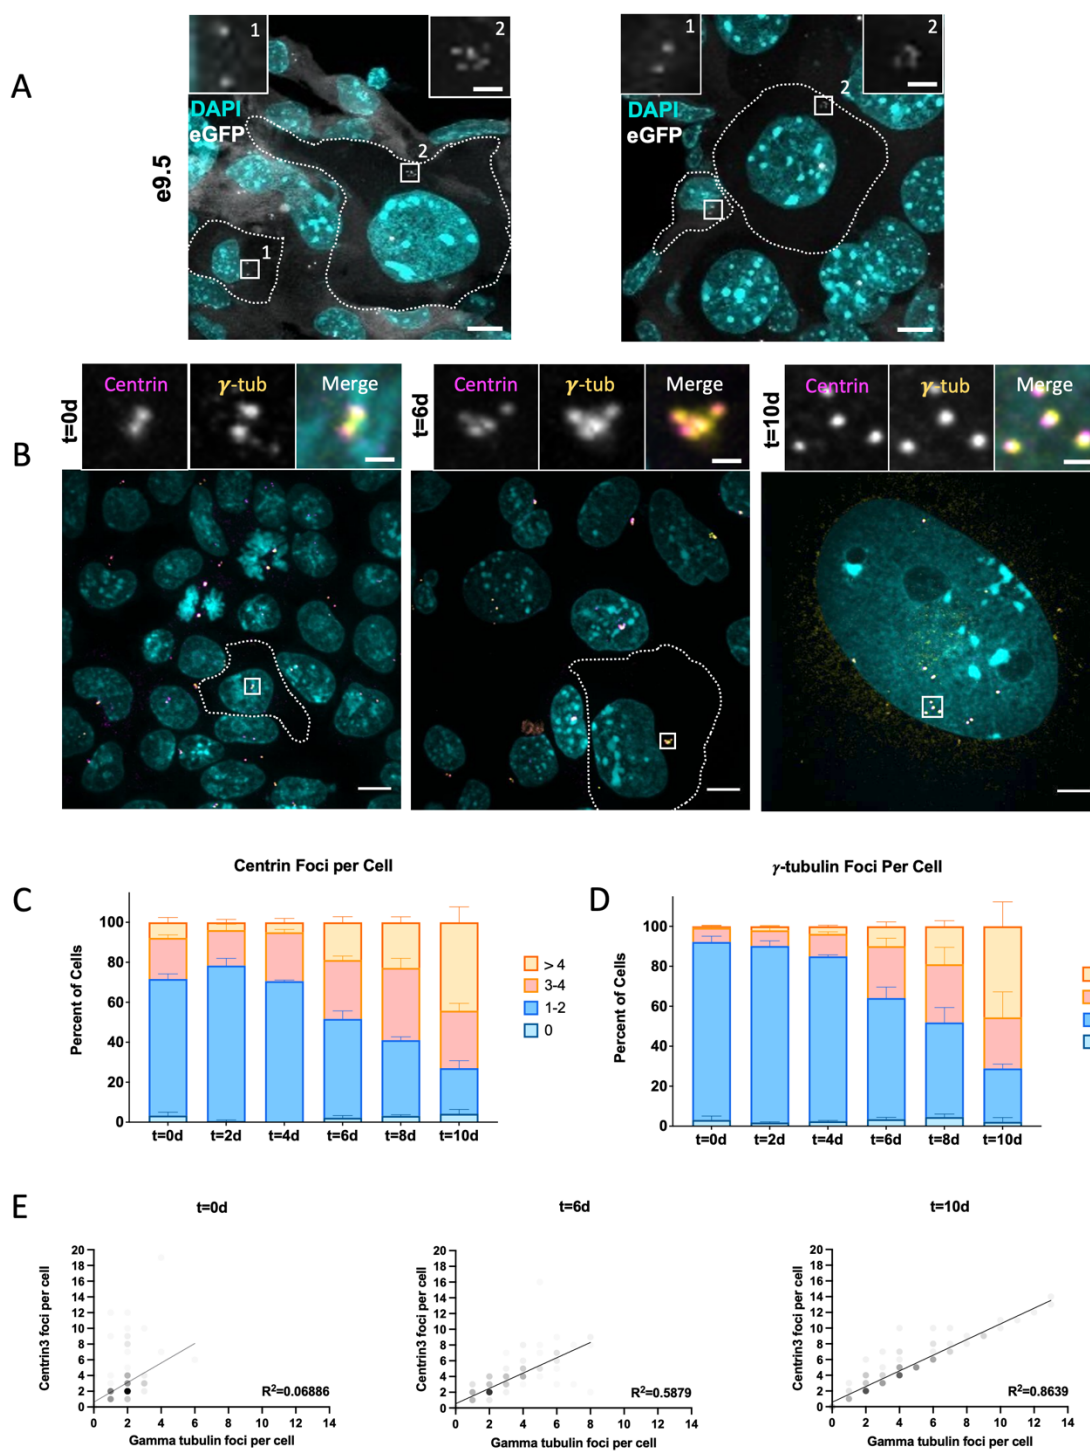

**Figure 2:** Increase in centriole number and centrosome number during TGC differentiation

- A. Confocal microscopy images of tissue sections of a mouse conceptus (e9.5) transgenic for *eGFP-centrin2/Ar113b-mCherry*. Sections correspond to the TGC layer described in 1A. DAPI (cyan) was used to visualize nuclei, and the native eGFP-centrin2 fluorescence to visualize centrioles (white). TGCs were identified by nuclear size relative to adjoining cells. Scale bars: overview, 10  $\mu\text{m}$ ; inset 2 $\mu\text{m}$ .
- B. Microscopic images of differentiating TGCs at t=0d, t=6d, and t=10d. Cells were fixed and labeled with antibodies to mark the centrosome ( $\gamma$ -tubulin, yellow) and centrioles (centrin, magenta). DAPI (cyan) was used to visualize nuclei. Centrioles from cells indicated with dashed lines are shown at higher magnification in insets. The t=10d images are from a large TGC whose boundary is beyond shown field of view. Scale bars: overview, 10  $\mu\text{m}$ ; inset 2 $\mu\text{m}$ .
- C. Quantification of centriole number throughout TGC differentiation as measured by centrin immunofluorescence, shows an increase in centriole number as cells differentiate. The percent of cells with the indicated centriole numbers was calculated in three independent experiments. For each experiment, a minimum of 60 cells per condition were counted; bars represent the mean percent of cells. Error bars represent the standard error of the mean (SEM).
- D. Quantification of centrosome number throughout TGC differentiation time course, as marked by  $\gamma$ -tubulin immunofluorescence. The percent of cells with the indicated centriole numbers was calculated in three independent experiments. For each experiment, a minimum of 60 cells per condition were counted; bars represent the mean percent of cells. Error bars represent the standard error of the mean (SEM).
- E. Correlation of centriole and centrosome number per cell as identified by centrin and  $\gamma$ -tubulin immunofluorescence, respectively, at the beginning of differentiation (t=0d) middle of differentiation (t=6d) and end of differentiation (t=10d) from the data in C and D, shading opacity of each point is 10%.



### Figure 3

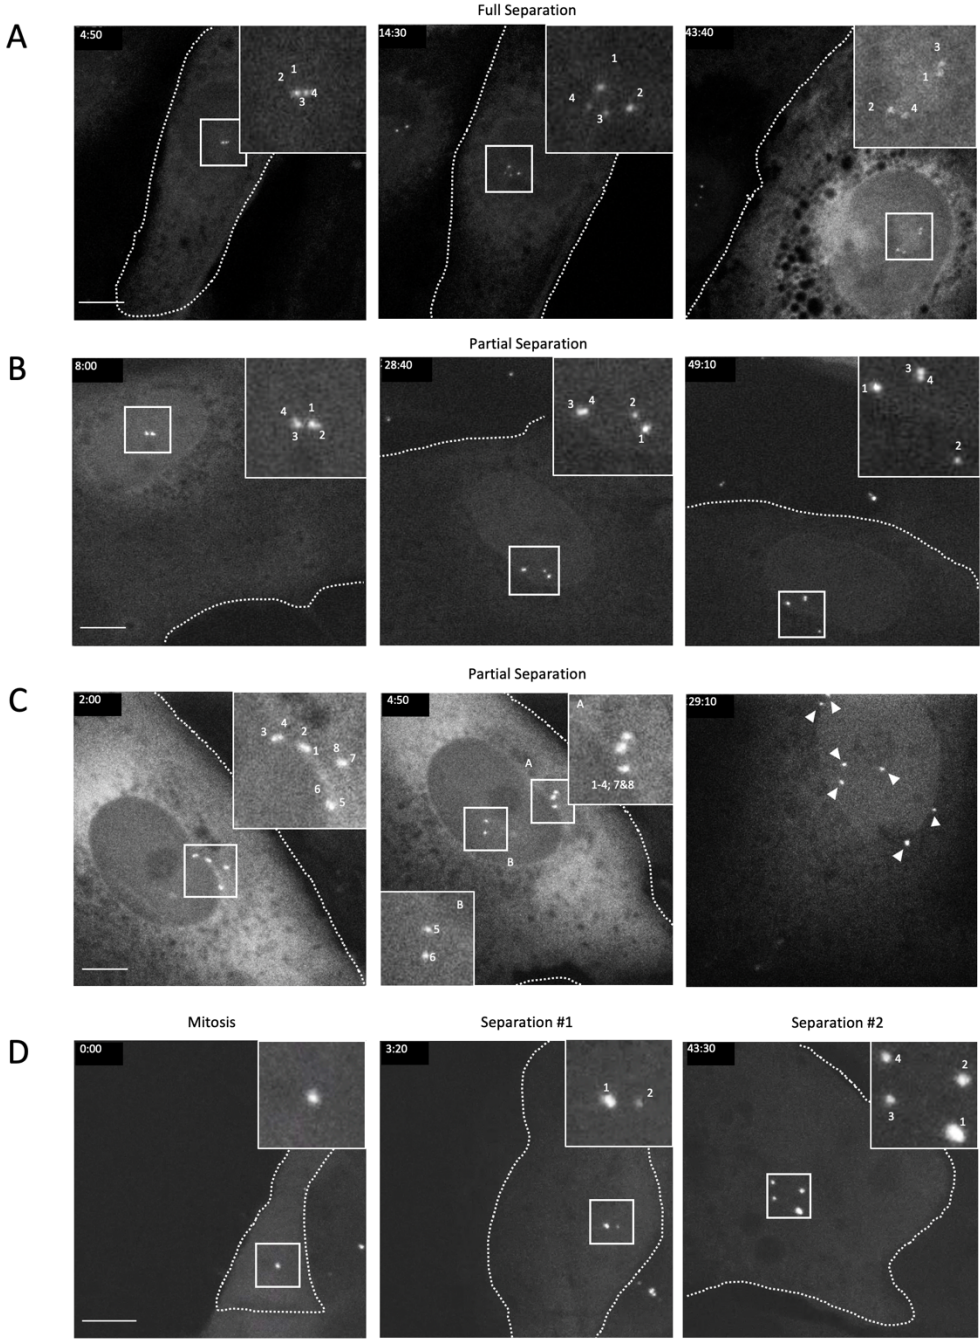

### Figure 3: Centriole disengagement in post-mitotic TGCs

A-D) Differentiating TGCs, with centrioles marked by eGFP-centrin2, demonstrating disengagement and full or partial separation of duplicated centrioles. Scale bars = 10  $\mu$ m.

- A. Still frames from Movie S1 demonstrating full separation of both centriole pairs. Panel 1 shows engaged configuration of centrioles that persists for ~14 hours before disengaging and separating both pairs of centrioles in panel 2 “Full Separation”. Panel 3 shows the same four centrioles nearly 30 hours later while the cell has dramatically enlarged both its nucleus and cytoplasm. Insets are shown at 3x magnification
- B. Still frames from Movie S2 demonstrating partial separation of a single centriole pair. Panel 2, “Partial Separation” demonstrates a single pair of centrioles (“3-4”) undergoing disengagement and separation while the other pair (“1-2”) remains tightly associated. Panel 3 shows the same cell with centrioles 3 and 4 remaining separated and centrioles 1-2 remaining associated hours later. Insets are shown at 3x magnification
- C. Still frames from Movie S3 demonstrating partial centriole separation for a pair of engaged centrioles in a cell with supernumerary centrioles. Panel 2, “Partial Separation” demonstrates a single pair of centrioles (“5-6”) undergoing disengagement and separation while the other pairs (“1-4; 7&8”) remain associated. Panel 3 shows the same cell one day later with most centrioles separated throughout the cell (arrowheads). Insets are shown at 2x magnification
- D. Still frames from Movie S4 demonstrating duplication, disengagement and separation after a mitotic event. Panels show a TSC undergoing mitosis (first panel, “Mitosis”), disengaging and separating centrioles (“Separation #1”), duplicating, disengaging, and separating centrioles again (“Separation #2”) without passing through a second mitosis. Insets are shown at 3x magnification.

Figure 4

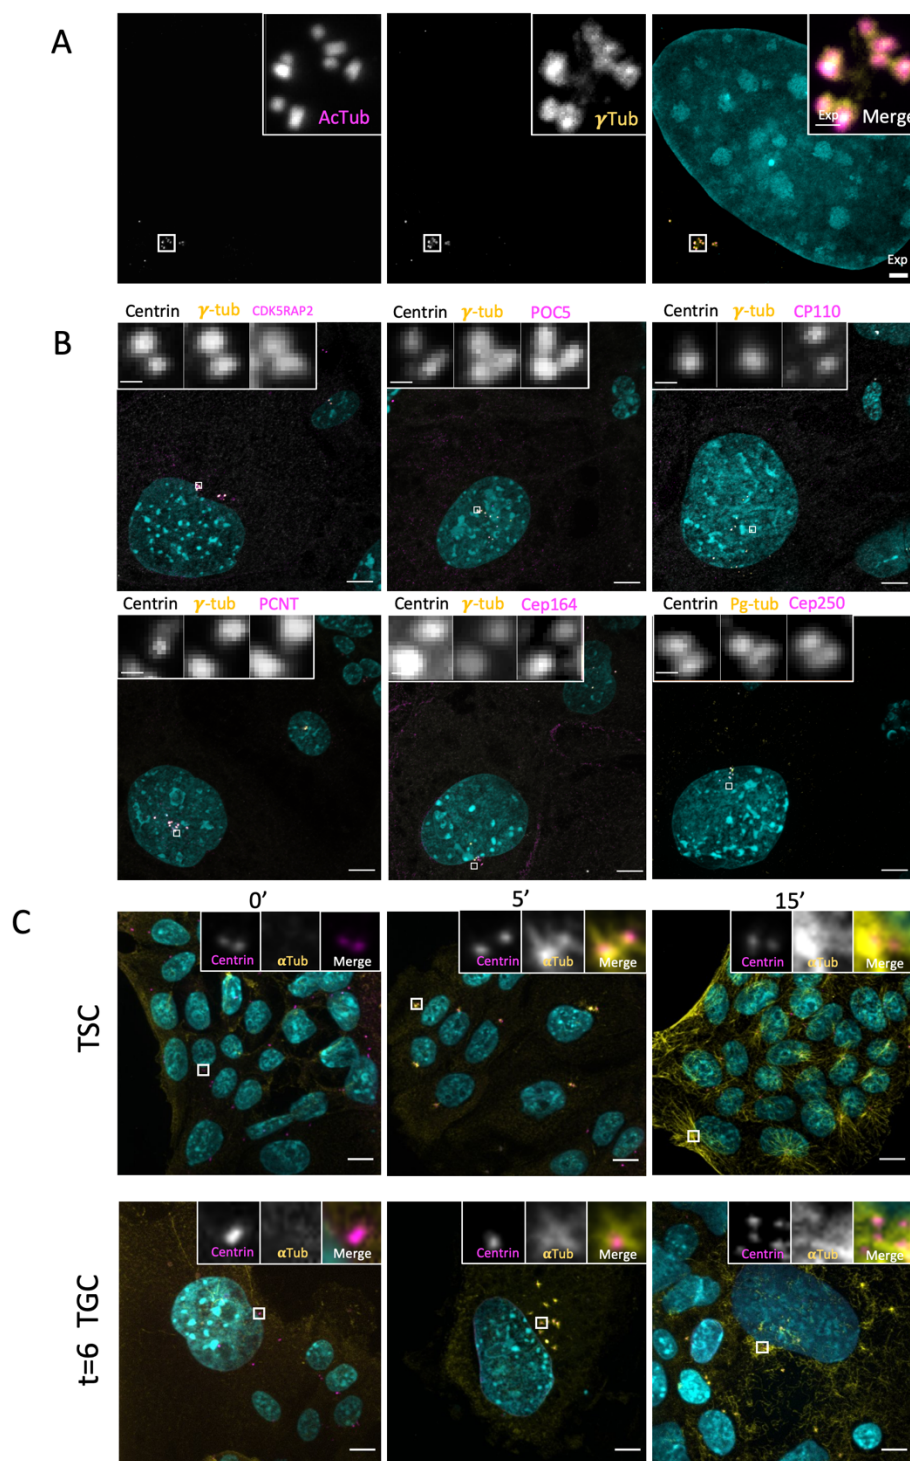

**Figure 4: Amplified centrioles in TGCs acquire microtubule nucleation competence**

- A. Expansion microscopy images of TGCs demonstrating supernumerary centriole content with expected morphology. Expanded TGCs were stained with antibodies to mark the centrioles (acetylated tubulin) and PCM ( $\gamma$ -tubulin) and were counterstained with DAPI, to mark nuclei. Scale bars = 10  $\mu$ m, inset = 2  $\mu$ m (expansion).
- B. Immunofluorescence images showing localization of various centrosome proteins in TGCs with amplified centrosomes. Cells were fixed and labeled with antibodies to label structural, PCM and appendage proteins as indicated above each panel. Scale bar = 10  $\mu$ m, inset = 1  $\mu$ m
- C. Immunofluorescence images showing TSCs (top) and TGCs (bottom) in a microtubule regrowth experiment. First panel shows cells just prior to washout (0 Min). Second and third panels show cells shortly after washout (5 min and 15 min). Cells were fixed and labeled with antibodies to mark microtubules ( $\alpha$ -tubulin, yellow), centrioles (centrin, magenta) and nuclei (DAPI, cyan). A-C Scale bars = 10  $\mu$ m, insets in C are shown at 7x magnification.

Figure 5

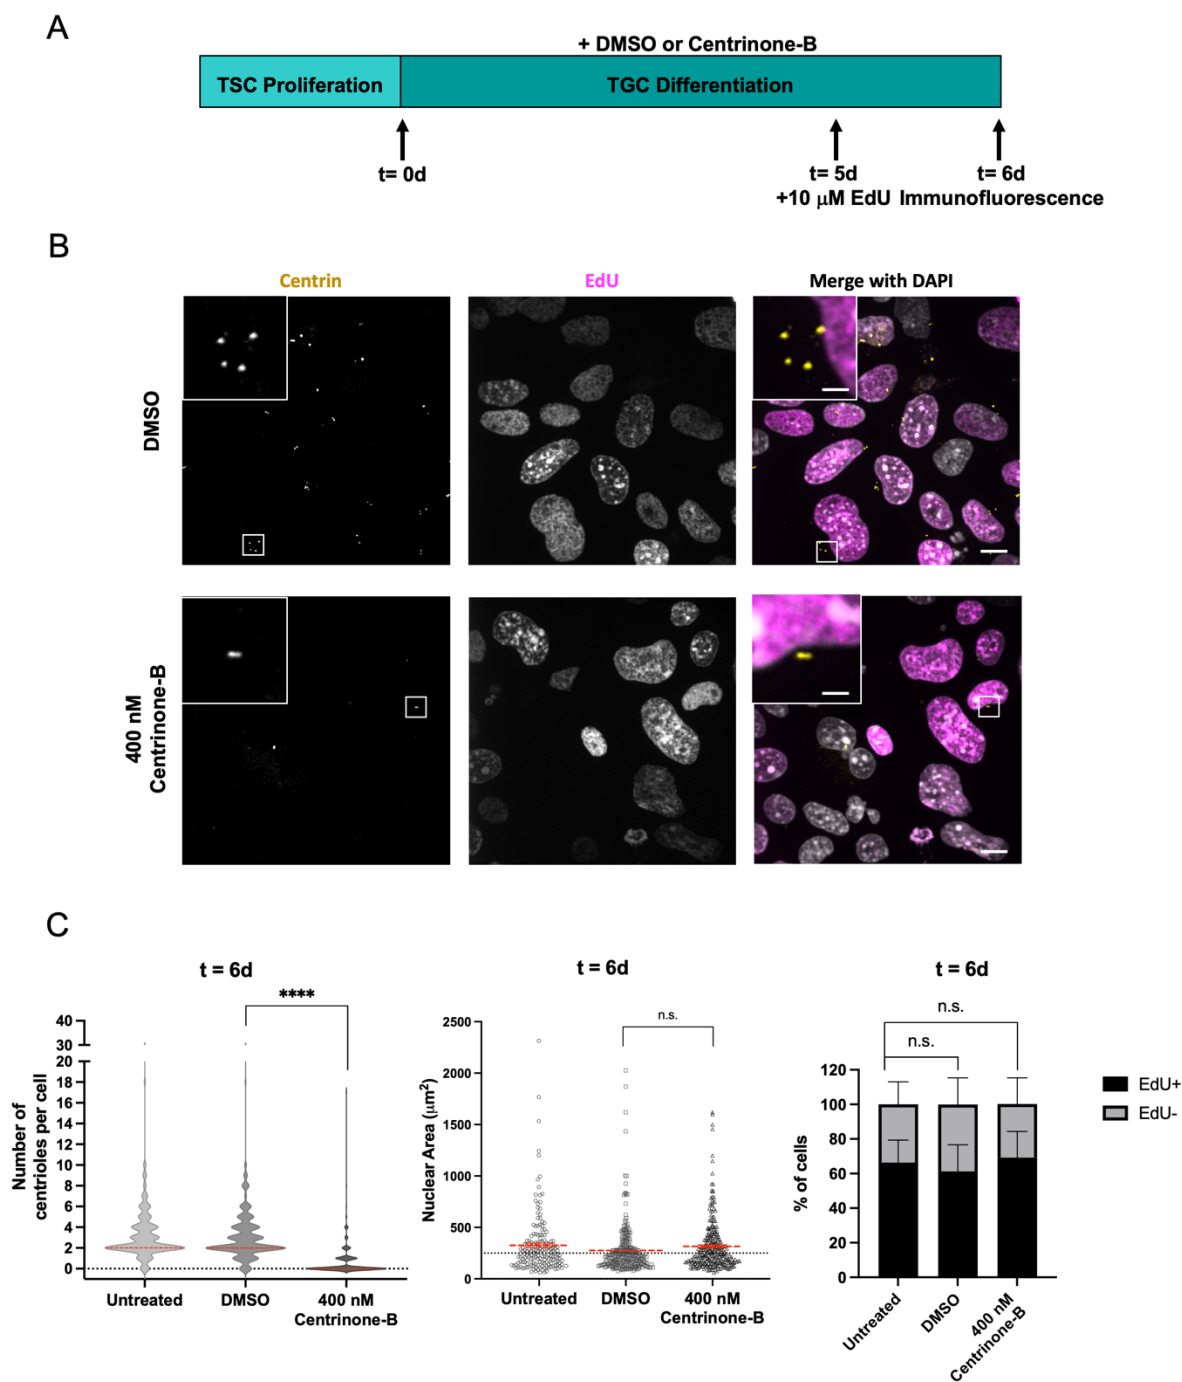

**Figure 5:** Increase in TGC centriole number during differentiation is dependent on PLK4 activity

- A. Schematic of experimental design. TSCs were seeded 24 hours prior to differentiation, as indicated by TSC proliferation. TGC differentiation was conducted in the presence of Centrinone-B, or an equivalent volume of DMSO as a control for up to six days. An untreated control was also included. To label nuclei that are actively replicating DNA in S-phase, TGCs were incubated with 10  $\mu$ M 5-ethynyl-2'-deoxyuridine (EdU) at 5d for 24 hours.
- B. Immunofluorescence of representative images of TGCs at t=6d. Centrioles were labeled with centrin (yellow) antibody and nuclei that entered S-phase were labeled for EdU incorporation using Click-it® Chemistry (magenta). Scale bars 10  $\mu$ m inset = 2  $\mu$ m
- C. Violin plot of centriole number in cells for t=6d during drug treatments and control conditions. Solid red lines indicate median.
- D. Quantification of nuclear area for t=6d during drug treatments and control conditions. Red horizontal lines represent the mean. Each dot represents a single cell mean (in red)
- E. Quantification of the EdU status for populations of cells at t=6d during drug treatments and control conditions. Results shown are for three independent experiments. At least 50 cells quantified per experiment for untreated, DMSO, and Centrinone-B treatments, error bars are the SEM. \*\*\*\*p-value  $\leq$ 0.0001, n.s., not significant.

Figure 6

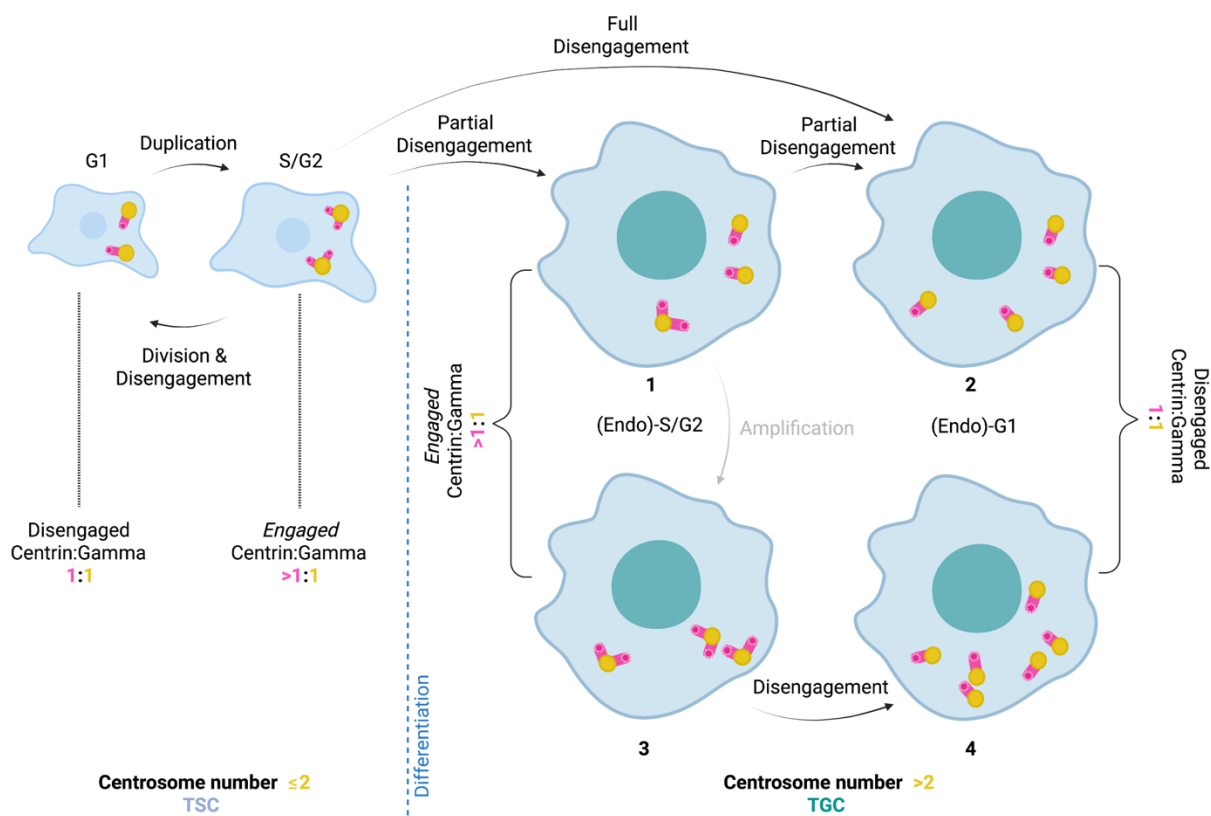

## **Figure 6:** Model of Centriole and Centrosome Amplification in Endocycling Murine TGCs

Cartoon diagram showing (left) a TSC with two centrosomes (yellow dots) with either two or four centrioles (magenta barrels) and ratios of  $\gamma$ -tubulin (to identify centrosomes) and centrin (to identify centrioles) given below. (Right) TGCs during differentiation with a variable number of centrosomes (yellow dots) and centrioles (magenta barrels). Most TGCs disengage their paired centrioles to reach a centrin to  $\gamma$ -tubulin ratio of 1:1. Some TGCs undergo additional centriole/centrosome amplification that also ultimately resolves to a 1:1 ratio of centrin to  $\gamma$ -tubulin at the end of the endocycle. Graphic was created with Biorender.com.



## Supplementary Figure 1

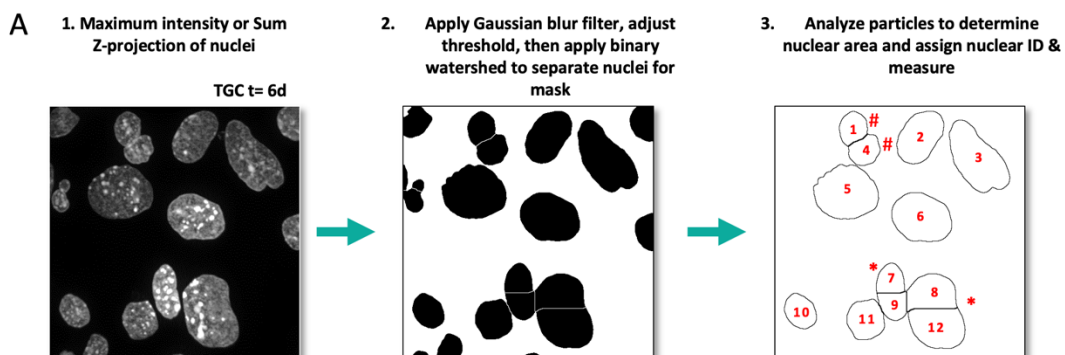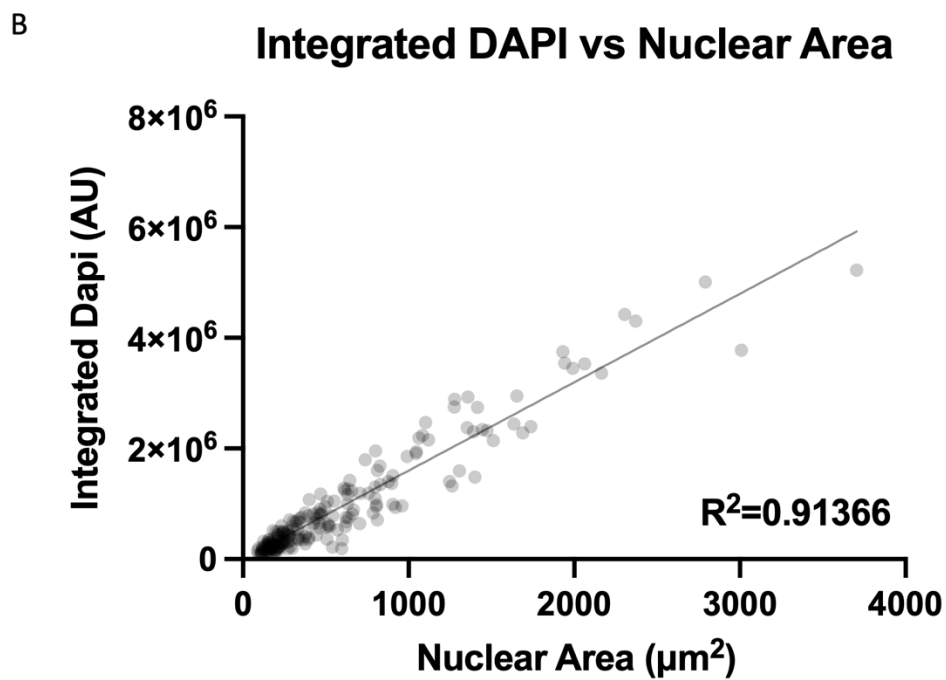

## **Supplementary Figure 1: Measurement of Integrated DAPI Signal and Nuclear Area in TGCs**

- A. Schematic of nuclear area quantification from ImageJ. An asterisk (\*) indicates nuclear areas that were combined due to an improper division of nuclei relative to the DAPI staining. An octothorpe (#) indicates properly split nuclear areas that are in the same cell that were excluded from analysis
- B. Plot of the integrated DAPI intensity vs the nuclear area for differentiating TGCs. Each dot on the scatterplot is shaded at 10% opacity and represents a single cell.

## Supplementary Figure 2

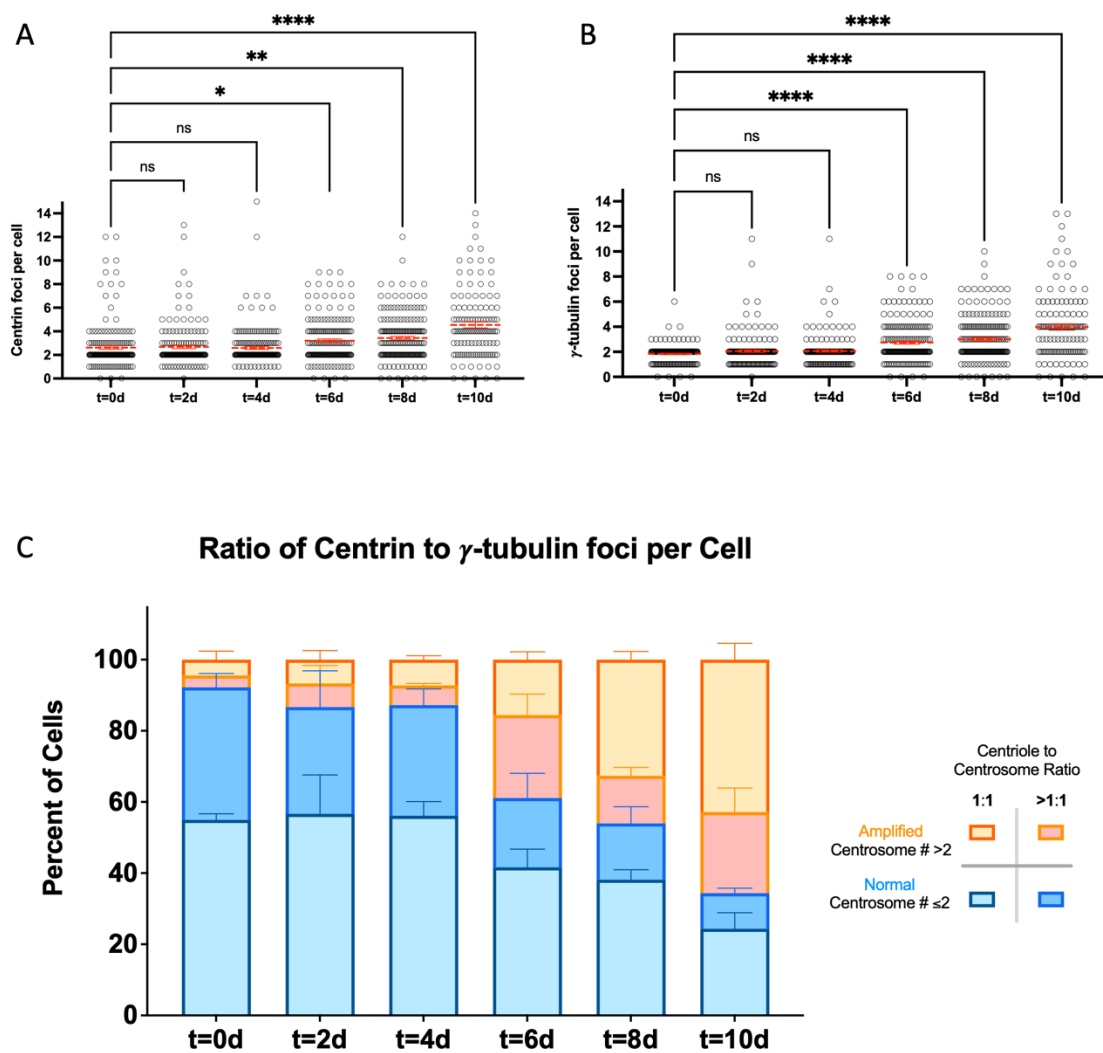

## Supplementary Figure 2: Centrioles and Centrosomes during TGC differentiation

- A. Quantification of centriole number throughout TGC differentiation as measured by centrin immunofluorescence from same raw data as Figure 2C. Solid red line indicated mean; error bars represent the standard error of the mean (SEM).
- B. Quantification of centrosome number from (B) throughout TGC differentiation as marked by  $\gamma$ -tubulin immunofluorescence from the same raw data as Figure 2D. Solid red line indicated mean; error bars represent the standard error of the mean (SEM).
- C. Ratio of centriole and centrosome number, as identified by foci of centrin and  $\gamma$ -tubulin immunofluorescence, respectively, throughout differentiation from the data in (A) and (B).

## Supplementary Video 1

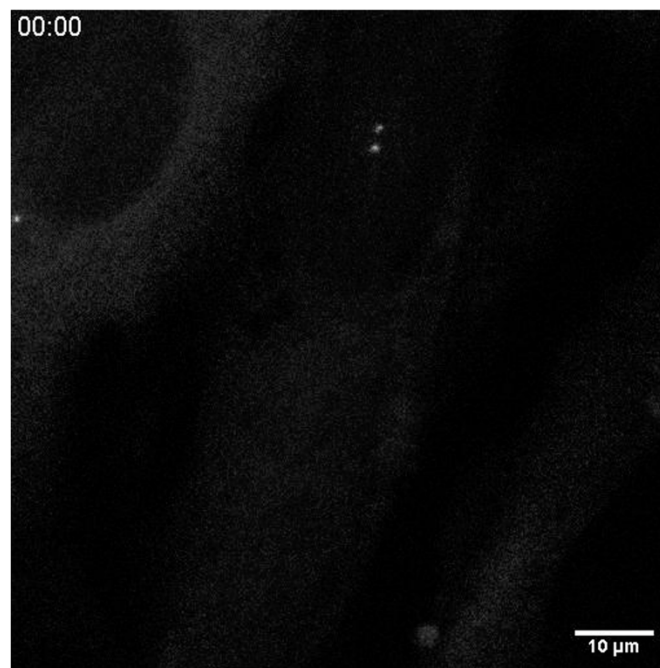

## **Supplementary Video 1: Full centriole disengagement in a differentiating TGC**

Time lapse movie showing a cell undergoing full centriole separation of both engaged pairs; arrow shows moment of separation. 10 minutes per frame, scale bar is 10 $\mu$ m.

## Supplementary Video 2

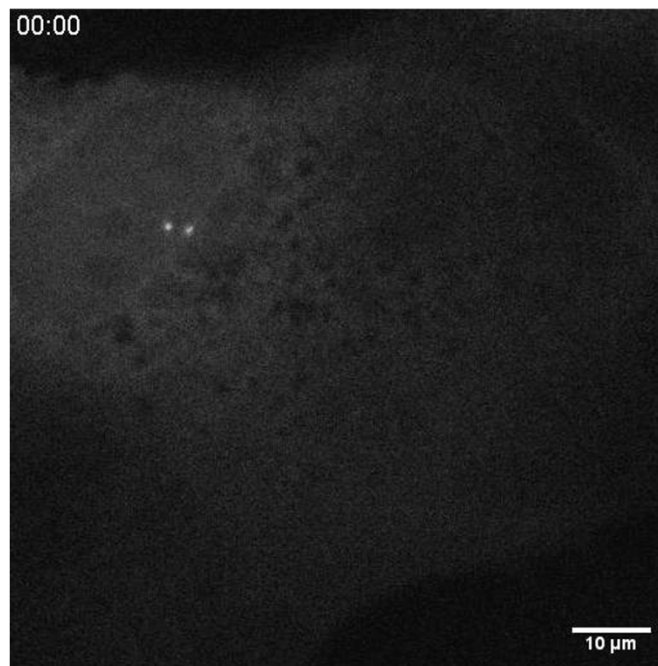

**Supplementary Video 2:** Partial centriole disengagement in a differentiating TGC  
Time lapse movie showing a cell undergoing partial centriole separation with one of two engaged pairs; arrow shows moment of separation. 10 minutes per frame, scale bar is 10 $\mu$ m.



## Supplementary Video 3

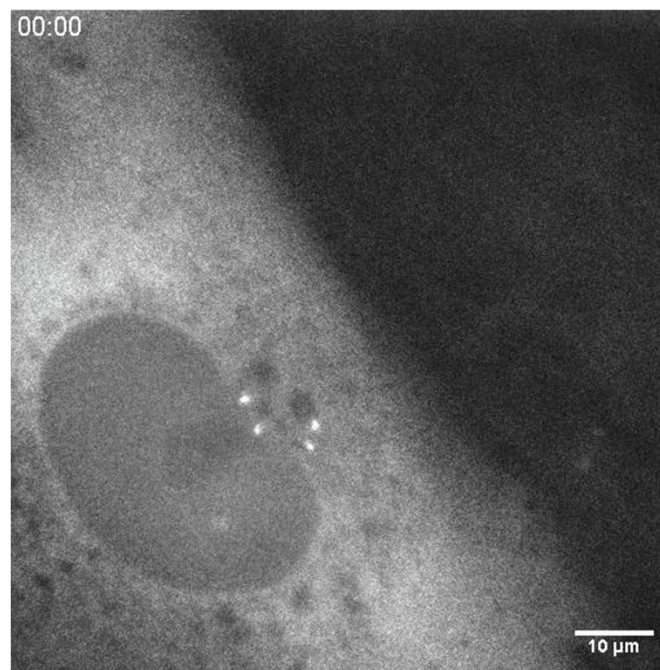

### **Supplementary Video 3: Partial supernumerary centriole disengagement in a differentiating TGC**

Time lapse movie showing a cell with supernumerary centrioles undergoing partial separation with subsequent pairs of centrioles; arrows show moments of separation. 10 minutes per frame, scale bar is 10 $\mu$ m.

## Supplementary Video 4

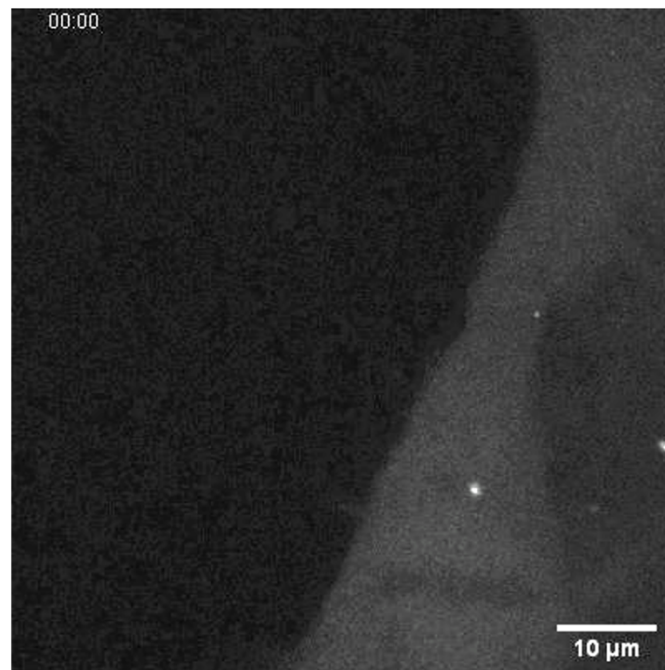

#### **Supplementary Video 4:** Post-mitotic centriole duplication and disengagement in a differentiating TGC

Time lapse movie showing a cell that has just completed mitosis undergoing disengagement separation of mother and grandmother centrioles (first arrow) and their respective procentrioles (second and third arrows). 10 minutes per frame, scale bar is 10 $\mu$ m.
